# Supplementary material for: Genome-wide single nucleotide polymorphism (SNP) data reveal potential candidate genes for litter traits in a Yorkshire pig population
Source: Copernicus journal article supplement (doi:10.5194/aab-66-357-2023), 2023-11-23
Supplement: Supplementary file 1 [file aab-66-357-2023-supplement.zip]

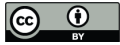

## *Supplement of*

# **Genome-wide single nucleotide polymorphism (SNP) data reveal potential candidate genes for litter traits in a Yorkshire pig population**

**Yu Zhang et al.**

*Correspondence to:* Qiang Chen (chq@sjtu.edu.cn) and Shaoxiong Lu (shxlu\_ynau@163.com)

- aab-66-357-2023-supplement-title-page.pdf
- supplement
  - Fig S1.docx
  - Fig S2.docx
  - Fig S3.docx
  - Table S1.xlsx
  - Table S2.xlsx
  - Table S3.xlsx
  - Table S4.xlsx
  - Table S5.xlsx

The copyright of individual parts of the supplement might differ from the article licence.
