# Supplementary material for: Genome-wide single nucleotide polymorphism (SNP) data reveal potential candidate genes for litter traits in a Yorkshire pig population
Source: Copernicus journal article supplement (doi:10.5194/aab-66-357-2023), 2023-11-23
Supplement: Supplementary file 2 [file Fig S2.docx]

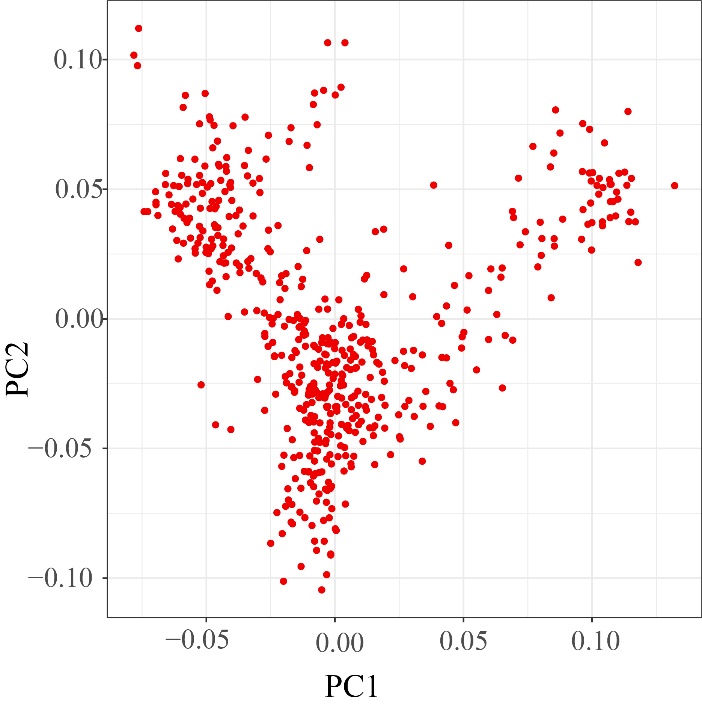


**Figure S2.** In the results of population principal component analysis, the X-axis represents PC1 and the Y-axis represents PC2.
