# Supplementary material for: Genome-wide single nucleotide polymorphism (SNP) data reveal potential candidate genes for litter traits in a Yorkshire pig population
Source: Copernicus journal article supplement (doi:10.5194/aab-66-357-2023), 2023-11-23
Supplement: Supplementary file 3 [file Fig S3.docx]

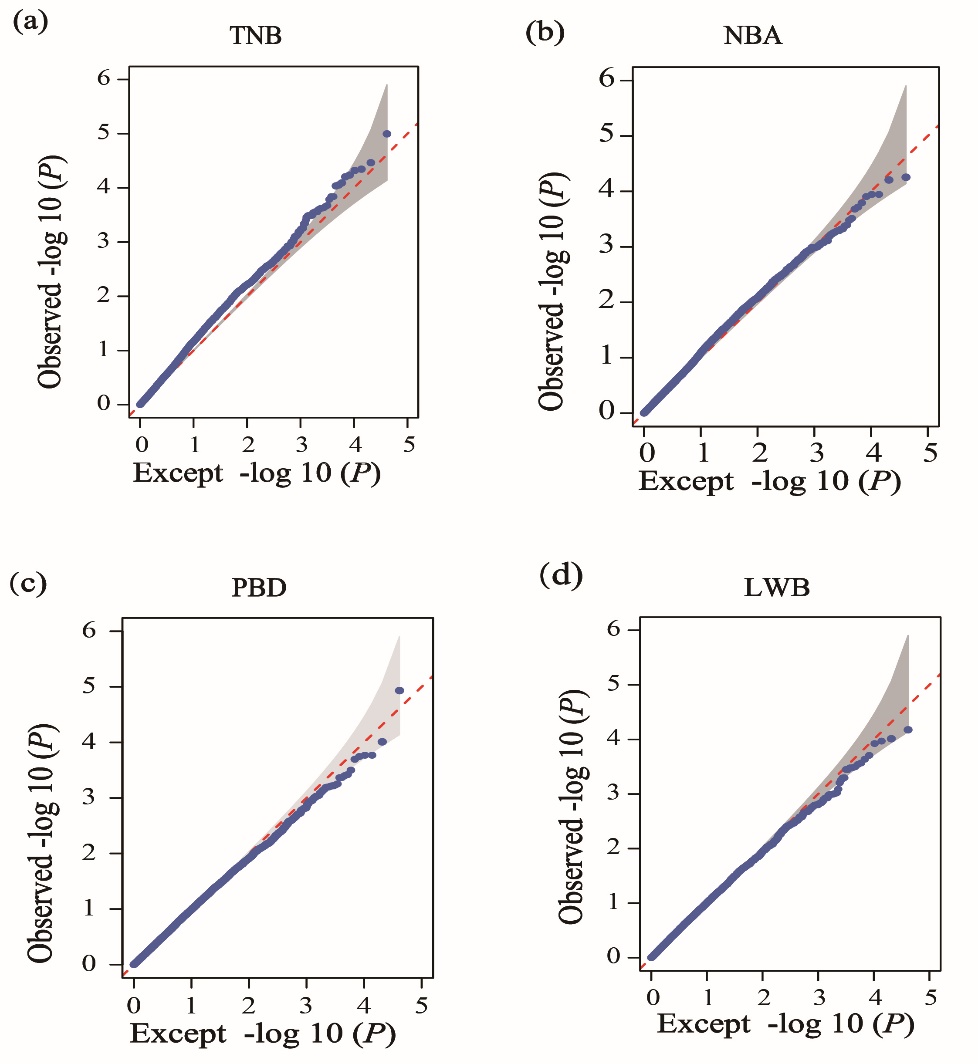


**Figure S3.** Q–Q plots of the observed p-values for TNB, NBA, LWB, and PBD. The y-axis represents the observed –log10-transformed p-values and the x-axis represents expected –log10-transformed p-values.
