# Supplementary material for: Genome-wide single nucleotide polymorphism (SNP) data reveal potential candidate genes for litter traits in a Yorkshire pig population
Source: Copernicus journal article supplement (doi:10.5194/aab-66-357-2023), 2023-11-23
Supplement: Supplementary file 4 [file Table S1.xlsx]

## Sheet: Sheet1
Table S1. Significant gene ontology (GO) terms and Kyoto Encyclopedia of Genes and Genomes (KEGG) pathways associated with litter traits in Yorkshare pigs (p < 0.05).
Term	Count	p_Value	Genes
GO:0006821~chloride transport	3	0.00122733	CLCN3, CLIC1
GO:0006749~glutathione metabolic process	2	0.0425494	CLIC1
GO:1902476~chloride transmembrane transport	2	0.0452074	CLCN3, CLIC1
ssc01212:Fatty acid metabolism	2	0.0317381	SCP2, CBR4
GO:0060078~regulation of postsynaptic membrane potential	2	0.0115499	GABRA2, GABRA4
GO:0051932~synaptic transmission, GABAergic	2	0.0146782	GABRA2, GABRA4
GO:0007214~gamma-aminobutyric acid signaling pathway	2	0.0229747	GABRA2, GABRA4
