# Supplementary material for: Genome-wide single nucleotide polymorphism (SNP) data reveal potential candidate genes for litter traits in a Yorkshire pig population
Source: Copernicus journal article supplement (doi:10.5194/aab-66-357-2023), 2023-11-23
Supplement: Supplementary file 5 [file Table S2.xlsx]

## Sheet: Table S2_Pi_S
Table S2. Statistical results of θπ ratio between the HP and LP sows.
Chrom	Bin_START	Bin_END	N_VARIANTS	Pi_ratio
1	3260001	3360000	2	2.61607
1	3270001	3370000	2	2.61607
1	3280001	3380000	2	2.61607
1	3290001	3390000	2	2.61607
1	3300001	3400000	2	2.61607
1	3310001	3410000	1	3.37499
1	3320001	3420000	1	3.37499
1	3330001	3430000	1	3.37499
1	3340001	3440000	1	3.37499
1	3350001	3450000	1	3.37499
1	10740001	10840000	1	2.125
1	10750001	10850000	1	2.125
1	10760001	10860000	1	2.125
1	10770001	10870000	1	2.125
1	10780001	10880000	1	2.125
1	10790001	10890000	1	2.125
1	10800001	10900000	2	2.125
1	11390001	11490000	1	2.16346
1	11400001	11500000	1	2.16346
1	11410001	11510000	1	2.16346
1	11420001	11520000	1	2.16346
1	11430001	11530000	1	2.16346
1	12100001	12200000	1	2.57142
1	12110001	12210000	1	2.57142
1	12120001	12220000	1	2.57142
1	12130001	12230000	1	2.57142
1	12140001	12240000	1	2.57142
1	12150001	12250000	1	2.57142
1	12160001	12260000	1	2.57142
1	12170001	12270000	1	2.57142
1	12180001	12280000	1	2.57142
1	12210001	12310000	2	2.25
1	12220001	12320000	3	2.32366
1	12230001	12330000	3	2.32366
1	12240001	12340000	3	2.32366
1	12250001	12350000	3	2.32366
1	12260001	12360000	3	2.32366
1	12270001	12370000	3	2.32366
1	12280001	12380000	3	2.32366
1	12290001	12390000	2	2.51095
1	12300001	12400000	2	2.51095
1	12310001	12410000	1	2.46913
1	12360001	12460000	1	2.57142
1	12370001	12470000	2	2.57143
1	12380001	12480000	2	2.57143
1	12390001	12490000	2	2.57143
1	12400001	12500000	2	2.57143
1	12410001	12510000	2	2.57143
1	12420001	12520000	2	2.57143
1	12430001	12530000	2	2.57143
1	12440001	12540000	2	2.57143
1	12450001	12550000	2	2.57143
1	12460001	12560000	1	2.57142
1	12480001	12580000	1	2.57142
1	12490001	12590000	1	2.57142
1	12500001	12600000	2	2.57143
1	12510001	12610000	2	2.57143
1	12520001	12620000	2	2.57143
1	12530001	12630000	2	2.57143
1	12540001	12640000	2	2.57143
1	12870001	12970000	2	2.51095
1	12880001	12980000	2	2.51095
1	12890001	12990000	2	2.51095
1	12900001	13000000	2	2.51095
1	18400001	18500000	1	3.76924
1	18410001	18510000	1	3.76924
1	18420001	18520000	1	3.76924
1	21820001	21920000	4	2.84642
1	21830001	21930000	5	2.96275
1	21840001	21940000	5	2.96275
1	21850001	21950000	5	2.96275
1	21860001	21960000	4	2.84642
1	21870001	21970000	4	2.84642
1	22010001	22110000	3	2.13475
1	22020001	22120000	3	2.13475
1	22030001	22130000	3	2.13475
1	22060001	22160000	2	2.36994
1	22070001	22170000	2	2.36994
1	22080001	22180000	2	2.36994
1	22090001	22190000	2	2.36994
1	22100001	22200000	2	2.36994
1	23240001	23340000	1	2.23213
1	23250001	23350000	1	2.23213
1	23260001	23360000	1	2.23213
1	23270001	23370000	1	2.23213
1	24090001	24190000	1	2.23213
1	24100001	24200000	1	2.23213
1	24510001	24610000	2	2.44706
1	28460001	28560000	1	2.17284
1	28470001	28570000	1	2.17284
1	29380001	29480000	1	3.14285
1	29390001	29490000	1	3.14285
1	29400001	29500000	1	3.14285
1	29410001	29510000	1	2.33333
1	29420001	29520000	1	2.33333
1	29430001	29530000	1	2.33333
1	29780001	29880000	1	3.14285
1	29790001	29890000	1	3.14285
1	29800001	29900000	1	3.14285
1	29810001	29910000	1	3.14285
1	29820001	29920000	1	3.14285
1	33680001	33780000	1	3
1	33690001	33790000	1	3
1	41670001	41770000	3	2.23077
1	41680001	41780000	3	2.23077
1	41930001	42030000	1	2.72839
1	41940001	42040000	1	2.72839
1	41950001	42050000	1	2.72839
1	41960001	42060000	1	2.72839
1	41970001	42070000	1	2.72839
1	41980001	42080000	1	2.72839
1	41990001	42090000	1	2.72839
1	42110001	42210000	1	2.72839
1	42120001	42220000	1	2.72839
1	42290001	42390000	1	2.72839
1	42300001	42400000	2	2.72839
1	42310001	42410000	2	2.72839
1	42320001	42420000	3	2.7284
1	42330001	42430000	4	2.63545
1	42340001	42440000	4	2.63545
1	42350001	42450000	4	2.63545
1	42360001	42460000	5	2.65526
1	42370001	42470000	5	2.65526
1	42380001	42480000	5	2.65526
1	42390001	42490000	4	2.63545
1	42400001	42500000	3	2.60092
1	42410001	42510000	3	2.60092
1	42420001	42520000	2	2.52554
1	42690001	42790000	3	2.21457
1	42890001	42990000	3	2.19444
1	42900001	43000000	3	2.19444
1	42910001	43010000	3	2.19444
1	42920001	43020000	2	3.85715
1	42930001	43030000	2	3.85715
1	42940001	43040000	2	3.85715
1	42950001	43050000	3	3.95035
1	42960001	43060000	2	4.01177
1	42970001	43070000	1	4.31034
1	42980001	43080000	1	4.31034
1	42990001	43090000	1	4.31034
1	43000001	43100000	1	4.31034
1	43010001	43110000	1	4.31034
1	43020001	43120000	1	4.31034
1	43030001	43130000	1	4.31034
1	43040001	43140000	1	4.31034
1	43090001	43190000	1	4.31034
1	43100001	43200000	1	4.31034
1	43110001	43210000	1	4.31034
1	43120001	43220000	1	4.31034
1	43130001	43230000	1	4.31034
1	43140001	43240000	1	4.31034
1	43150001	43250000	1	4.31034
1	43160001	43260000	1	4.31034
1	43170001	43270000	2	4.31036
1	43180001	43280000	2	4.31036
1	43190001	43290000	1	4.31034
1	43200001	43300000	2	4.63794
1	43210001	43310000	2	4.63794
1	43220001	43320000	2	4.63794
1	43230001	43330000	2	4.63794
1	43240001	43340000	2	4.63794
1	43250001	43350000	2	4.63794
1	43260001	43360000	2	4.63794
1	43270001	43370000	1	4.96551
1	43280001	43380000	1	4.96551
1	43290001	43390000	1	4.96551
1	43360001	43460000	1	4.96551
1	43370001	43470000	1	4.96551
1	43380001	43480000	1	4.96551
1	43390001	43490000	1	4.96551
1	43400001	43500000	1	4.96551
1	43410001	43510000	1	4.96551
1	43420001	43520000	1	4.96551
1	43430001	43530000	1	4.96551
1	43440001	43540000	1	4.96551
1	43450001	43550000	1	4.96551
1	43480001	43580000	1	3.94642
1	43490001	43590000	1	3.94642
1	43500001	43600000	1	3.94642
1	43510001	43610000	1	3.94642
1	43520001	43620000	1	3.94642
1	43530001	43630000	1	3.94642
1	43540001	43640000	2	4.07059
1	43550001	43650000	2	4.07059
1	43560001	43660000	2	4.07059
1	43570001	43670000	2	4.07059
1	43580001	43680000	2	3.82353
1	43590001	43690000	2	3.82353
1	43600001	43700000	2	3.82353
1	43610001	43710000	2	3.82353
1	43620001	43720000	2	3.82353
1	43630001	43730000	2	3.82353
1	43640001	43740000	1	3.57142
1	43650001	43750000	2	3.30589
1	43660001	43760000	2	3.30589
1	43670001	43770000	2	3.30589
1	43680001	43780000	1	2.7931
1	43690001	43790000	1	2.7931
1	43700001	43800000	1	2.7931
1	43710001	43810000	1	2.7931
1	43720001	43820000	2	3.41177
1	43730001	43830000	2	3.41177
1	43740001	43840000	2	3.41177
1	43750001	43850000	1	3.73213
1	43760001	43860000	1	3.73213
1	43770001	43870000	2	3.83929
1	43780001	43880000	2	3.83929
1	43790001	43890000	2	3.83929
1	43800001	43900000	2	3.83929
1	43810001	43910000	2	3.83929
1	43820001	43920000	1	3.94642
1	43830001	43930000	1	3.94642
1	43840001	43940000	1	3.94642
1	43850001	43950000	1	3.94642
1	43860001	43960000	2	3.75893
1	43870001	43970000	1	3.57142
1	43880001	43980000	2	3.75893
1	43890001	43990000	3	3.87233
1	43900001	44000000	3	3.87233
1	43910001	44010000	3	3.87233
1	43920001	44020000	4	4.05883
1	43930001	44030000	5	4.03097
1	43940001	44040000	5	4.03097
1	43950001	44050000	6	4.01419
1	43960001	44060000	5	4.1239
1	43970001	44070000	5	4.1239
1	43980001	44080000	4	4.51176
1	43990001	44090000	3	4.55318
1	44000001	44100000	3	4.55318
1	44010001	44110000	4	4.51176
1	44020001	44120000	3	4.41843
1	44030001	44130000	2	4.72942
1	44040001	44140000	2	4.72942
1	44050001	44150000	1	6.24138
1	44060001	44160000	1	6.24138
1	44070001	44170000	2	4.6706
1	44080001	44180000	2	4.01177
1	44090001	44190000	2	4.01177
1	44100001	44200000	2	4.01177
1	44110001	44210000	1	3.85713
1	44120001	44220000	2	3.49412
1	44130001	44230000	2	3.49412
1	44140001	44240000	3	3.70175
1	44150001	44250000	3	3.70175
1	44160001	44260000	3	3.70175
1	44170001	44270000	2	3.55173
1	44180001	44280000	2	3.55173
1	44190001	44290000	2	3.55173
1	44200001	44300000	3	3.70175
1	44210001	44310000	3	3.70175
1	44220001	44320000	2	4.01177
1	44230001	44330000	2	4.01177
1	44240001	44340000	1	3.85713
1	44250001	44350000	1	3.85713
1	44260001	44360000	1	3.85713
1	44270001	44370000	3	3.91666
1	44280001	44380000	3	3.91666
1	44290001	44390000	3	3.91666
1	44300001	44400000	3	4.02128
1	44310001	44410000	3	4.02128
1	44320001	44420000	3	4.02128
1	44330001	44430000	4	4.07057
1	44340001	44440000	4	4.07057
1	44350001	44450000	5	4.10553
1	44360001	44460000	5	4.10553
1	44370001	44470000	3	4.31034
1	44380001	44480000	3	4.31034
1	44390001	44490000	3	4.31034
1	44400001	44500000	3	4.89655
1	44410001	44510000	3	4.89655
1	44420001	44520000	3	4.89655
1	44430001	44530000	2	5.18967
1	44440001	44540000	2	5.18967
1	44450001	44550000	1	6.06897
1	44460001	44560000	1	6.06897
1	44470001	44570000	2	4.52942
1	44480001	44580000	2	4.52942
1	44490001	44590000	2	4.52942
1	44500001	44600000	1	3.73213
1	44510001	44610000	1	3.73213
1	44520001	44620000	1	3.73213
1	44530001	44630000	1	3.73213
1	44540001	44640000	1	3.73213
1	44550001	44650000	1	3.73213
1	44560001	44660000	1	3.73213
1	44860001	44960000	1	5.55172
1	44870001	44970000	1	5.55172
1	44880001	44980000	1	5.55172
1	44890001	44990000	1	5.55172
1	44900001	45000000	1	5.55172
1	44910001	45010000	1	5.55172
1	44920001	45020000	1	5.55172
1	44930001	45030000	1	5.55172
1	44970001	45070000	1	3.73213
1	44980001	45080000	1	3.73213
1	44990001	45090000	2	3.41177
1	45000001	45100000	2	3.41177
1	45010001	45110000	2	3.41177
1	45020001	45120000	3	3.25439
1	45030001	45130000	3	3.25439
1	45040001	45140000	3	3.25439
1	45050001	45150000	3	3.25439
1	45060001	45160000	3	3.25439
1	45070001	45170000	2	2.79311
1	45080001	45180000	2	2.79311
1	45090001	45190000	1	2.7931
1	45100001	45200000	1	2.7931
1	45110001	45210000	1	2.7931
1	45120001	45220000	1	3.73213
1	45130001	45230000	1	3.73213
1	45140001	45240000	1	3.73213
1	45150001	45250000	1	3.73213
1	45160001	45260000	1	3.73213
1	45170001	45270000	1	3.73213
1	45180001	45280000	1	3.73213
1	45190001	45290000	1	3.73213
1	45200001	45300000	1	3.73213
1	45210001	45310000	1	3.73213
1	45270001	45370000	1	4.73213
1	45280001	45380000	1	4.73213
1	45290001	45390000	1	4.73213
1	45300001	45400000	2	4.07059
1	45310001	45410000	3	3.93616
1	45320001	45420000	4	3.87816
1	45330001	45430000	4	3.87816
1	45340001	45440000	5	4.15929
1	45350001	45450000	5	3.9115
1	45360001	45460000	5	3.9115
1	45370001	45470000	4	3.97057
1	45380001	45480000	5	3.79899
1	45390001	45490000	5	3.79899
1	45400001	45500000	4	3.97057
1	45410001	45510000	3	4.0877
1	45420001	45520000	2	4.43105
1	45430001	45530000	2	4.43105
1	45440001	45540000	1	2.7931
1	45450001	45550000	1	2.7931
1	45460001	45560000	1	2.7931
1	45470001	45570000	1	2.7931
1	45520001	45620000	1	2.7931
1	45530001	45630000	2	3.18966
1	45540001	45640000	2	3.18966
1	45550001	45650000	3	3.05747
1	45560001	45660000	3	3.05747
1	45570001	45670000	3	3.05747
1	45580001	45680000	4	2.99138
1	45590001	45690000	4	2.99138
1	45600001	45700000	4	2.99138
1	45610001	45710000	4	2.99138
1	45620001	45720000	3	3.05747
1	45630001	45730000	2	2.79311
1	45640001	45740000	2	2.79311
1	45650001	45750000	1	2.7931
1	45660001	45760000	1	2.7931
1	45670001	45770000	1	2.7931
1	45680001	45780000	1	2.7931
1	45690001	45790000	1	2.7931
1	45700001	45800000	1	2.7931
1	45710001	45810000	1	2.7931
1	45720001	45820000	1	2.7931
1	45730001	45830000	1	2.7931
1	45740001	45840000	1	2.7931
1	45750001	45850000	1	2.7931
1	45760001	45860000	2	3.55173
1	45770001	45870000	2	3.55173
1	45780001	45880000	2	5.18967
1	45790001	45890000	2	5.18967
1	45800001	45900000	2	5.18967
1	45810001	45910000	2	5.18967
1	45820001	45920000	2	5.18967
1	45830001	45930000	2	5.18967
1	45840001	45940000	3	4.65517
1	45850001	45950000	3	4.65517
1	45860001	45960000	2	4.8276
1	45870001	45970000	2	4.8276
1	45880001	45980000	2	3.94829
1	45890001	45990000	2	3.94829
1	45900001	46000000	2	3.94829
1	45910001	46010000	2	3.94829
1	45920001	46020000	2	3.94829
1	45930001	46030000	3	3.27586
1	45940001	46040000	2	3.1207
1	45950001	46050000	2	3.1207
1	45960001	46060000	3	3.48246
1	45970001	46070000	3	3.48246
1	45980001	46080000	2	3.2
1	45990001	46090000	2	3.2
1	46000001	46100000	2	3.2
1	46010001	46110000	2	3.2
1	46020001	46120000	2	3.2
1	46030001	46130000	1	3.85713
1	46040001	46140000	2	3.76471
1	46050001	46150000	2	3.76471
1	46060001	46160000	1	3.5862
1	46070001	46170000	1	3.5862
1	46080001	46180000	1	3.5862
1	46090001	46190000	1	3.5862
1	46100001	46200000	1	3.5862
1	46110001	46210000	1	3.5862
1	46120001	46220000	1	3.5862
1	46130001	46230000	1	3.5862
1	46180001	46280000	1	6.51724
1	46190001	46290000	1	6.51724
1	46200001	46300000	1	6.51724
1	46210001	46310000	1	6.51724
1	46220001	46320000	1	6.51724
1	46230001	46330000	2	4.68236
1	46240001	46340000	2	4.68236
1	46250001	46350000	3	4.4035
1	46260001	46360000	3	4.4035
1	46270001	46370000	3	4.4035
1	46280001	46380000	3	3.70213
1	46290001	46390000	3	3.70213
1	46300001	46400000	3	3.70213
1	46310001	46410000	3	3.70213
1	46320001	46420000	3	3.70213
1	46330001	46430000	2	3.68236
1	46340001	46440000	2	3.68236
1	46350001	46450000	1	3.73213
1	46360001	46460000	2	3.68236
1	46370001	46470000	5	3.84956
1	46380001	46480000	4	3.88823
1	46390001	46490000	4	3.88823
1	46400001	46500000	4	3.88823
1	46410001	46510000	4	3.88823
1	46420001	46520000	4	3.88823
1	46430001	46530000	4	3.88823
1	46440001	46540000	4	3.88823
1	46450001	46550000	4	3.88823
1	46460001	46560000	3	3.95035
1	46510001	46610000	1	3.5862
1	46520001	46620000	3	5.51725
1	46530001	46630000	3	5.51725
1	46540001	46640000	3	5.51725
1	46550001	46650000	3	5.51725
1	46560001	46660000	3	5.51725
1	46570001	46670000	3	5.51725
1	46580001	46680000	3	5.51725
1	46590001	46690000	3	5.51725
1	46600001	46700000	3	5.51725
1	46610001	46710000	2	6.48278
1	46650001	46750000	1	3.5862
1	46660001	46760000	1	3.5862
1	46670001	46770000	1	3.5862
1	46680001	46780000	1	3.5862
1	46690001	46790000	1	3.5862
1	46700001	46800000	1	3.5862
1	46710001	46810000	1	3.5862
1	46720001	46820000	1	3.5862
1	46730001	46830000	1	3.5862
1	46740001	46840000	1	3.5862
1	46770001	46870000	1	4.31034
1	46780001	46880000	1	4.31034
1	46790001	46890000	2	4.01177
1	46800001	46900000	2	4.01177
1	46810001	46910000	2	4.01177
1	46820001	46920000	2	4.01177
1	46830001	46930000	2	4.01177
1	46840001	46940000	2	4.01177
1	46850001	46950000	2	4.01177
1	46860001	46960000	2	4.01177
1	46870001	46970000	1	3.85713
1	46880001	46980000	1	3.85713
1	46990001	47090000	1	5.55172
1	47000001	47100000	1	5.55172
1	47010001	47110000	1	5.55172
1	47020001	47120000	1	5.55172
1	47030001	47130000	1	5.55172
1	47040001	47140000	1	5.55172
1	47050001	47150000	1	5.55172
1	47060001	47160000	1	5.55172
1	47070001	47170000	2	4.56897
1	47080001	47180000	2	4.56897
1	47090001	47190000	1	3.5862
1	47100001	47200000	2	4.56897
1	47110001	47210000	2	4.56897
1	47120001	47220000	2	4.56897
1	47130001	47230000	2	4.56897
1	47140001	47240000	3	4.89655
1	47150001	47250000	3	4.89655
1	47160001	47260000	3	4.89655
1	47170001	47270000	2	5.55174
1	47180001	47280000	2	5.55174
1	47190001	47290000	2	5.55174
1	47200001	47300000	1	5.55172
1	47210001	47310000	1	5.55172
1	47220001	47320000	1	5.55172
1	47230001	47330000	2	4.56897
1	47240001	47340000	1	3.5862
1	47250001	47350000	1	3.5862
1	47260001	47360000	1	3.5862
1	47270001	47370000	1	3.5862
1	47280001	47380000	1	3.5862
1	47290001	47390000	1	3.5862
1	47300001	47400000	1	3.5862
1	47310001	47410000	1	3.5862
1	47320001	47420000	2	3.58622
1	47330001	47430000	2	3.76471
1	47340001	47440000	2	3.76471
1	47350001	47450000	2	3.76471
1	47360001	47460000	2	3.76471
1	47370001	47470000	2	3.76471
1	47380001	47480000	2	3.76471
1	47390001	47490000	2	3.76471
1	47400001	47500000	2	3.76471
1	47410001	47510000	2	3.76471
1	47420001	47520000	1	3.85713
1	47600001	47700000	1	6.89655
1	47610001	47710000	1	6.89655
1	47620001	47720000	2	6.48278
1	47630001	47730000	2	6.48278
1	47640001	47740000	2	6.48278
1	47650001	47750000	2	6.48278
1	47660001	47760000	2	6.48278
1	47670001	47770000	2	6.48278
1	47680001	47780000	2	6.48278
1	47690001	47790000	3	5.13159
1	47700001	47800000	3	4.21277
1	47710001	47810000	4	4.11167
1	47720001	47820000	3	3.77381
1	47730001	47830000	3	3.77381
1	47740001	47840000	5	3.74308
1	47750001	47850000	5	3.74308
1	47760001	47860000	5	3.74308
1	47770001	47870000	5	3.74308
1	47780001	47880000	5	3.74308
1	47790001	47890000	4	3.74619
1	47800001	47900000	3	3.75177
1	47810001	47910000	2	3.68236
1	47820001	47920000	2	3.68236
1	47830001	47930000	2	3.68236
1	47920001	48020000	2	2.36208
1	47930001	48030000	2	2.36208
1	47940001	48040000	1	2.7931
1	47950001	48050000	2	3.41177
1	47960001	48060000	2	3.41177
1	47970001	48070000	2	3.41177
1	47980001	48080000	2	3.41177
1	47990001	48090000	3	3.58866
1	48000001	48100000	3	3.58866
1	48010001	48110000	3	3.58866
1	48020001	48120000	2	3.79464
1	48030001	48130000	2	3.79464
1	48040001	48140000	2	3.79464
1	48050001	48150000	2	4.4353
1	48060001	48160000	3	4.71929
1	48070001	48170000	3	4.71929
1	48080001	48180000	3	4.71929
1	48090001	48190000	2	5.55174
1	48100001	48200000	2	5.55174
1	48110001	48210000	2	5.55174
1	48120001	48220000	2	5.55174
1	48130001	48230000	2	5.55174
1	48140001	48240000	2	5.55174
1	48150001	48250000	2	4.35295
1	48160001	48260000	1	3.73213
1	48170001	48270000	1	3.73213
1	48180001	48280000	1	3.73213
1	48190001	48290000	1	3.73213
1	48200001	48300000	1	3.73213
1	48210001	48310000	1	3.73213
1	48220001	48320000	1	3.73213
1	48230001	48330000	1	3.73213
1	48240001	48340000	2	3.73215
1	48250001	48350000	1	3.73213
1	48260001	48360000	1	3.73213
1	48270001	48370000	1	3.73213
1	48280001	48380000	1	3.73213
1	48290001	48390000	1	3.73213
1	48300001	48400000	1	3.73213
1	48310001	48410000	2	3.68236
1	48320001	48420000	2	3.68236
1	48330001	48430000	2	3.68236
1	48340001	48440000	1	3.5862
1	48350001	48450000	1	3.5862
1	48360001	48460000	1	3.5862
1	48370001	48470000	1	3.5862
1	48380001	48480000	1	3.5862
1	48390001	48490000	1	3.5862
1	48400001	48500000	1	3.5862
1	48430001	48530000	1	3.5862
1	48440001	48540000	2	3.94829
1	48450001	48550000	2	3.94829
1	48460001	48560000	2	3.94829
1	48470001	48570000	2	3.94829
1	48480001	48580000	2	3.94829
1	48490001	48590000	3	3.90351
1	48500001	48600000	3	3.90351
1	48510001	48610000	4	3.98599
1	48520001	48620000	4	3.98599
1	48530001	48630000	3	4.0877
1	48540001	48640000	2	4.01177
1	48550001	48650000	2	4.01177
1	48560001	48660000	2	4.01177
1	48570001	48670000	2	4.01177
1	48580001	48680000	2	4.01177
1	48590001	48690000	2	3.94829
1	48600001	48700000	2	3.94829
1	48610001	48710000	1	3.5862
1	48620001	48720000	1	3.5862
1	48630001	48730000	1	3.5862
1	48640001	48740000	1	3.5862
1	48650001	48750000	1	3.5862
1	48660001	48760000	1	3.5862
1	48670001	48770000	1	3.5862
1	48680001	48780000	1	3.5862
1	48690001	48790000	1	3.5862
1	48700001	48800000	1	3.5862
1	48710001	48810000	1	3.5862
1	48720001	48820000	1	3.5862
1	48730001	48830000	1	3.5862
1	48740001	48840000	2	3.58622
1	48750001	48850000	3	3.58621
1	48760001	48860000	3	3.58621
1	48770001	48870000	3	3.58621
1	48780001	48880000	3	3.58621
1	48790001	48890000	2	3.58622
1	48800001	48900000	2	3.58622
1	48810001	48910000	2	3.58622
1	48820001	48920000	2	3.58622
1	48830001	48930000	3	4.4138
1	48840001	48940000	2	4.8276
1	48850001	48950000	1	6.06897
1	48860001	48960000	1	6.06897
1	48870001	48970000	1	6.06897
1	48880001	48980000	1	6.06897
1	48890001	48990000	1	6.06897
1	48900001	49000000	1	6.06897
1	48910001	49010000	1	6.06897
1	48920001	49020000	1	6.06897
1	48930001	49030000	1	2.87499
1	48940001	49040000	1	2.87499
1	48950001	49050000	1	2.87499
1	48960001	49060000	2	3.11765
1	48970001	49070000	2	3.11765
1	48980001	49080000	2	3.11765
1	48990001	49090000	2	3.11765
1	49000001	49100000	2	3.11765
1	49010001	49110000	2	3.11765
1	49020001	49120000	3	2.92771
1	49030001	49130000	2	2.95454
1	49040001	49140000	3	3.21688
1	49050001	49150000	3	3.21688
1	49060001	49160000	2	3.13868
1	49070001	49170000	2	3.13868
1	49080001	49180000	3	3.21688
1	49090001	49190000	3	3.21688
1	49100001	49200000	4	3.64102
1	49110001	49210000	4	3.64102
1	49120001	49220000	4	4.19411
1	49130001	49230000	4	4.19411
1	49140001	49240000	3	4.42105
1	49150001	49250000	3	4.42105
1	49160001	49260000	3	4.42105
1	49170001	49270000	3	4.42105
1	49180001	49280000	2	4.70589
1	49190001	49290000	2	4.70589
1	49200001	49300000	2	3.6875
1	49210001	49310000	2	3.6875
1	49220001	49320000	1	3.37499
1	49230001	49330000	2	3.91765
1	49240001	49340000	3	3.35542
1	49250001	49350000	3	3.35542
1	49260001	49360000	3	3.35542
1	49270001	49370000	5	3.34058
1	49280001	49380000	5	3.34058
1	49290001	49390000	5	3.34058
1	49300001	49400000	4	3.33182
1	49310001	49410000	4	3.33182
1	49320001	49420000	4	3.33182
1	49330001	49430000	3	3.08377
1	49340001	49440000	3	3.66186
1	49350001	49450000	3	3.66186
1	49360001	49460000	3	3.66186
1	49370001	49470000	2	4.96553
1	49380001	49480000	2	4.96553
1	49390001	49490000	2	4.96553
1	49400001	49500000	2	4.96553
1	49410001	49510000	2	4.96553
1	49420001	49520000	3	3.66186
1	49430001	49530000	3	3.66186
1	49440001	49540000	2	3.31817
1	49450001	49550000	2	3.31817
1	49460001	49560000	2	3.31817
1	49470001	49570000	2	3.31817
1	49480001	49580000	3	3.45783
1	49490001	49590000	3	3.45783
1	49500001	49600000	3	3.45783
1	49510001	49610000	3	3.45783
1	49520001	49620000	2	4.15295
1	49530001	49630000	2	4.15295
1	49540001	49640000	2	4.15295
1	49550001	49650000	3	4.35965
1	49560001	49660000	3	4.35965
1	49570001	49670000	2	4.15295
1	49580001	49680000	3	4.2807
1	49590001	49690000	3	4.2807
1	49600001	49700000	3	4.2807
1	49610001	49710000	3	4.2807
1	49620001	49720000	3	4.2807
1	49630001	49730000	3	4.2807
1	49640001	49740000	3	4.2807
1	49650001	49750000	2	4.04707
1	49660001	49760000	2	4.04707
1	49670001	49770000	3	2.96297
1	49700001	49800000	2	2.70677
1	49710001	49810000	2	2.70677
1	49720001	49820000	2	2.70677
1	49730001	49830000	3	3.21604
1	49740001	49840000	3	3.21604
1	49750001	49850000	4	3.48169
1	49760001	49860000	4	3.48169
1	49770001	49870000	4	3.50786
1	49780001	49880000	4	3.50786
1	49790001	49890000	4	3.50786
1	49800001	49900000	4	3.50786
1	49810001	49910000	4	3.50786
1	49820001	49920000	4	3.50786
1	49830001	49930000	3	3.14196
1	49840001	49940000	3	3.14196
1	49850001	49950000	2	2.74436
1	49860001	49960000	2	2.74436
1	49870001	49970000	1	4.96551
1	49880001	49980000	2	5.25863
1	49890001	49990000	3	5.1609
1	49900001	50000000	2	5.25863
1	49910001	50010000	2	5.25863
1	49920001	50020000	3	5.3563
1	49930001	50030000	3	5.3563
1	49940001	50040000	4	5.25862
1	49950001	50050000	4	5.25862
1	49960001	50060000	5	5.2
1	49970001	50070000	5	5.2
1	49980001	50080000	4	5.11207
1	49990001	50090000	3	5.1609
1	50000001	50100000	4	4.01398
1	50010001	50110000	4	4.01398
1	50020001	50120000	3	3.62281
1	50030001	50130000	3	3.62281
1	50040001	50140000	2	3.16471
1	50050001	50150000	3	3.62281
1	50060001	50160000	2	3.16471
1	50070001	50170000	2	3.16471
1	50080001	50180000	3	3.62281
1	50090001	50190000	3	3.62281
1	50100001	50200000	2	4.96553
1	50110001	50210000	2	4.96553
1	50120001	50220000	2	4.96553
1	50130001	50230000	2	4.96553
1	50140001	50240000	2	4.96553
1	50150001	50250000	1	4.96551
1	50160001	50260000	3	3.29496
1	50170001	50270000	3	3.29496
1	50180001	50280000	2	2.85454
1	50190001	50290000	3	3.29496
1	50200001	50300000	3	3.29496
1	50210001	50310000	3	3.29496
1	50220001	50320000	4	2.94092
1	50230001	50330000	4	2.94092
1	50240001	50340000	4	2.94092
1	50250001	50350000	4	2.94092
1	50260001	50360000	2	3.02727
1	50270001	50370000	2	3.02727
1	50280001	50380000	2	3.02727
1	50290001	50390000	1	2.33333
1	50300001	50400000	1	2.33333
1	50310001	50410000	1	2.33333
1	50360001	50460000	1	3.5862
1	50370001	50470000	1	3.5862
1	50380001	50480000	2	3.58622
1	50390001	50490000	2	3.58622
1	50400001	50500000	2	3.58622
1	50410001	50510000	3	2.92105
1	50420001	50520000	3	2.92105
1	50430001	50530000	4	2.67692
1	50440001	50540000	4	2.67692
1	50450001	50550000	4	2.67692
1	50460001	50560000	3	2.51807
1	50470001	50570000	3	2.51807
1	50480001	50580000	3	2.27462
1	50490001	50590000	3	2.27462
1	50500001	50600000	3	2.27462
1	50510001	50610000	2	2.29197
1	50520001	50620000	2	2.29197
1	50530001	50630000	1	2.23213
1	50540001	50640000	1	2.23213
1	50550001	50650000	1	2.23213
1	50560001	50660000	1	2.23213
1	50570001	50670000	1	2.23213
1	50840001	50940000	1	3.5862
1	50850001	50950000	1	3.5862
1	50860001	50960000	1	3.5862
1	50870001	50970000	2	3.58622
1	50880001	50980000	2	3.58622
1	50890001	50990000	2	3.58622
1	50900001	51000000	3	3.36842
1	50910001	51010000	3	3.36842
1	50920001	51020000	3	3.36842
1	50930001	51030000	3	3.36842
1	50940001	51040000	3	3.36842
1	50950001	51050000	3	3.36842
1	50960001	51060000	3	3.36842
1	50970001	51070000	2	3.29412
1	50980001	51080000	2	3.29412
1	50990001	51090000	2	3.29412
1	51000001	51100000	2	3.58622
1	51010001	51110000	2	3.58622
1	51020001	51120000	2	3.58622
1	51030001	51130000	2	3.58622
1	51040001	51140000	2	3.58622
1	51050001	51150000	2	3.58622
1	51060001	51160000	2	3.58622
1	51070001	51170000	2	3.58622
1	51080001	51180000	2	3.58622
1	51090001	51190000	2	3.58622
1	51100001	51200000	2	3.94829
1	51110001	51210000	2	3.94829
1	51120001	51220000	2	3.94829
1	51130001	51230000	2	3.94829
1	51140001	51240000	1	4.31034
1	51150001	51250000	1	4.31034
1	51160001	51260000	1	4.31034
1	51170001	51270000	1	4.31034
1	51180001	51280000	1	4.31034
1	51190001	51290000	1	4.31034
1	51240001	51340000	1	3.5862
1	51250001	51350000	1	3.5862
1	51260001	51360000	2	3.58622
1	51270001	51370000	2	3.58622
1	51280001	51380000	2	3.58622
1	51290001	51390000	2	3.58622
1	51300001	51400000	2	3.58622
1	51310001	51410000	2	3.58622
1	51320001	51420000	2	3.58622
1	51330001	51430000	3	3.58621
1	51340001	51440000	2	3.58622
1	51350001	51450000	2	3.58622
1	51360001	51460000	2	3.11765
1	51370001	51470000	2	3.11765
1	51380001	51480000	2	3.11765
1	51390001	51490000	3	3.12765
1	51400001	51500000	3	3.12765
1	51410001	51510000	4	3.20587
1	51420001	51520000	4	3.20587
1	51430001	51530000	3	3.12765
1	51440001	51540000	3	3.12765
1	51450001	51550000	3	3.12765
1	51460001	51560000	2	3.29412
1	51470001	51570000	2	3.29412
1	51480001	51580000	2	3.29412
1	51490001	51590000	1	3.5862
1	51500001	51600000	1	3.5862
1	51720001	51820000	1	3.5862
1	51730001	51830000	1	3.5862
1	51740001	51840000	1	3.5862
1	51750001	51850000	1	3.5862
1	51760001	51860000	1	3.5862
1	51770001	51870000	1	3.5862
1	51780001	51880000	1	3.5862
1	51790001	51890000	1	3.5862
1	51800001	51900000	1	3.5862
1	51810001	51910000	1	3.5862
1	51860001	51960000	1	3.5862
1	51870001	51970000	1	3.5862
1	51880001	51980000	1	3.5862
1	51890001	51990000	1	3.5862
1	51900001	52000000	1	3.5862
1	51910001	52010000	1	3.5862
1	51920001	52020000	1	3.5862
1	51930001	52030000	1	3.5862
1	51940001	52040000	1	3.5862
1	51950001	52050000	1	3.5862
1	52060001	52160000	2	2.12942
1	52070001	52170000	2	2.12942
1	52080001	52180000	2	2.12942
1	52090001	52190000	2	2.12942
1	52100001	52200000	2	2.12942
1	52110001	52210000	2	2.12942
1	52120001	52220000	2	2.12942
1	52130001	52230000	2	2.6875
1	52140001	52240000	2	2.6875
1	52150001	52250000	2	2.6875
1	52160001	52260000	1	3.14285
1	52170001	52270000	1	3.14285
1	52180001	52280000	1	3.14285
1	52190001	52290000	1	3.14285
1	52200001	52300000	1	3.14285
1	52210001	52310000	1	3.14285
1	52220001	52320000	1	3.14285
1	52250001	52350000	1	3.14285
1	52260001	52360000	1	3.14285
1	52270001	52370000	1	3.14285
1	52280001	52380000	2	3.14286
1	52290001	52390000	2	3.14286
1	52300001	52400000	2	3.14286
1	52310001	52410000	2	3.14286
1	52320001	52420000	3	3.07092
1	52330001	52430000	3	3.07092
1	52340001	52440000	3	3.07092
1	52350001	52450000	2	3.02354
1	52360001	52460000	2	3.02354
1	52370001	52470000	2	3.02354
1	52380001	52480000	1	2.7931
1	52390001	52490000	1	2.7931
1	52400001	52500000	1	2.7931
1	52410001	52510000	1	2.7931
1	52560001	52660000	1	3.5862
1	52570001	52670000	1	3.5862
1	52580001	52680000	1	3.5862
1	52590001	52690000	1	3.5862
1	52600001	52700000	1	3.5862
1	52610001	52710000	1	3.5862
1	52620001	52720000	1	3.5862
1	52630001	52730000	1	3.5862
1	52640001	52740000	1	3.5862
1	52650001	52750000	1	3.5862
1	52750001	52850000	1	2.87499
1	52760001	52860000	1	2.87499
1	52770001	52870000	1	2.87499
1	52780001	52880000	1	2.87499
1	52790001	52890000	2	3.00893
1	52800001	52900000	2	3.00893
1	52810001	52910000	3	2.96429
1	52820001	52920000	3	2.96429
1	52830001	52930000	3	2.96429
1	52840001	52940000	4	2.94196
1	52850001	52950000	3	2.96429
1	52860001	52960000	3	2.96429
1	52870001	52970000	3	2.96429
1	52880001	52980000	3	2.96429
1	52890001	52990000	2	2.875
1	52900001	53000000	3	2.87499
1	52910001	53010000	2	2.875
1	52920001	53020000	2	2.875
1	52930001	53030000	3	2.96429
1	52940001	53040000	2	3.00893
1	52950001	53050000	3	3.12765
1	52960001	53060000	3	3.12765
1	52970001	53070000	3	3.12765
1	52980001	53080000	3	3.12765
1	52990001	53090000	3	3.12765
1	53000001	53100000	2	3.29412
1	53010001	53110000	2	3.29412
1	53020001	53120000	2	3.29412
1	53030001	53130000	1	3.5862
1	53040001	53140000	2	3.11765
1	53050001	53150000	2	3.11765
1	53060001	53160000	2	3.11765
1	53070001	53170000	2	3.11765
1	53080001	53180000	3	3.03509
1	53090001	53190000	3	3.03509
1	53100001	53200000	3	3.03509
1	53110001	53210000	3	3.03509
1	53120001	53220000	3	3.03509
1	53130001	53230000	3	3.03509
1	53140001	53240000	2	3.18966
1	53150001	53250000	1	2.7931
1	53160001	53260000	1	2.7931
1	53170001	53270000	1	2.7931
1	53200001	53300000	1	2.87499
1	53210001	53310000	1	2.87499
1	53220001	53320000	1	2.87499
1	53230001	53330000	1	2.87499
1	53240001	53340000	1	2.87499
1	53250001	53350000	1	2.87499
1	53260001	53360000	1	2.87499
1	53270001	53370000	1	2.87499
1	53280001	53380000	1	2.87499
1	53290001	53390000	1	2.87499
1	53300001	53400000	1	2.87499
1	53310001	53410000	1	2.87499
1	53320001	53420000	1	2.87499
1	53330001	53430000	2	2.875
1	53340001	53440000	2	2.875
1	53350001	53450000	2	2.875
1	53360001	53460000	2	2.875
1	53370001	53470000	2	2.875
1	53380001	53480000	2	2.875
1	53390001	53490000	2	2.875
1	53400001	53500000	1	2.87499
1	53410001	53510000	1	2.87499
1	53420001	53520000	1	2.87499
1	53430001	53530000	1	2.87499
1	53440001	53540000	1	2.87499
1	53450001	53550000	1	2.87499
1	53460001	53560000	1	2.87499
1	53470001	53570000	1	2.87499
1	53480001	53580000	1	2.87499
1	53490001	53590000	1	2.87499
1	53500001	53600000	1	2.87499
1	53510001	53610000	1	2.87499
1	53520001	53620000	1	2.87499
1	53580001	53680000	1	3.5862
1	53590001	53690000	1	3.5862
1	53600001	53700000	1	3.5862
1	53610001	53710000	1	3.5862
1	53620001	53720000	1	3.5862
1	53630001	53730000	1	3.5862
1	53640001	53740000	1	3.5862
1	53650001	53750000	1	3.5862
1	53660001	53760000	1	3.5862
1	53670001	53770000	1	3.5862
1	53680001	53780000	1	3.5862
1	53690001	53790000	1	3.5862
1	53700001	53800000	1	3.5862
1	53710001	53810000	1	3.5862
1	53720001	53820000	1	3.5862
1	53730001	53830000	1	3.5862
1	53740001	53840000	1	3.5862
1	53750001	53850000	1	3.5862
1	53760001	53860000	1	3.5862
1	53770001	53870000	1	3.5862
1	53780001	53880000	1	3.5862
1	53790001	53890000	1	3.5862
1	53800001	53900000	2	3.58622
1	53810001	53910000	2	3.58622
1	53820001	53920000	2	4.98277
1	53830001	53930000	2	4.98277
1	53840001	53940000	2	4.98277
1	53850001	53950000	2	6.37933
1	53860001	53960000	2	6.37933
1	53870001	53970000	3	5.4483
1	53880001	53980000	3	5.4483
1	53890001	53990000	3	5.4483
1	53900001	54000000	2	6.37933
1	53910001	54010000	2	6.37933
1	53920001	54020000	2	6.37933
1	53930001	54030000	2	6.37933
1	53940001	54040000	2	7.77587
1	53950001	54050000	2	6.37933
1	53960001	54060000	2	6.37933
1	53970001	54070000	1	9.17241
1	54000001	54100000	1	9.17241
1	54010001	54110000	1	9.17241
1	54020001	54120000	1	6.3793
1	54030001	54130000	2	4.24707
1	54040001	54140000	2	3.29412
1	54050001	54150000	2	4.24707
1	54060001	54160000	2	4.24707
1	54070001	54170000	3	4.07896
1	54080001	54180000	3	4.07896
1	54090001	54190000	3	4.07896
1	54100001	54200000	3	4.07896
1	54110001	54210000	3	4.07896
1	54120001	54220000	4	3.97903
1	54130001	54230000	3	4.51724
1	54140001	54240000	3	4.51724
1	54150001	54250000	3	3.58621
1	54160001	54260000	3	3.58621
1	54170001	54270000	2	3.58622
1	54180001	54280000	2	3.58622
1	54190001	54290000	2	3.58622
1	54200001	54300000	1	3.5862
1	54210001	54310000	2	3.58622
1	54220001	54320000	1	3.5862
1	54230001	54330000	1	3.5862
1	54240001	54340000	2	3.29412
1	54250001	54350000	2	3.29412
1	54260001	54360000	2	3.29412
1	54270001	54370000	2	3.29412
1	54280001	54380000	2	3.29412
1	54290001	54390000	2	3.29412
1	54300001	54400000	2	3.29412
1	54310001	54410000	1	3.14285
1	54320001	54420000	1	3.14285
1	54330001	54430000	1	3.14285
1	54360001	54460000	2	3.29412
1	54370001	54470000	2	3.29412
1	54380001	54480000	3	3.36842
1	54390001	54490000	4	3.41259
1	54400001	54500000	4	3.41259
1	54410001	54510000	4	3.41259
1	54420001	54520000	4	3.41259
1	54430001	54530000	4	3.41259
1	54440001	54540000	4	3.41259
1	54450001	54550000	5	3.44186
1	54460001	54560000	3	3.58621
1	54470001	54570000	3	3.58621
1	54480001	54580000	2	3.58622
1	54490001	54590000	1	3.5862
1	54500001	54600000	1	3.5862
1	54510001	54610000	1	3.5862
1	54520001	54620000	1	3.5862
1	54530001	54630000	1	3.5862
1	54540001	54640000	1	3.5862
1	54660001	54760000	1	6.03569
1	54670001	54770000	1	7.48212
1	54680001	54780000	1	7.48212
1	54690001	54790000	1	6.03569
1	54700001	54800000	1	6.03569
1	54710001	54810000	1	6.03569
1	54720001	54820000	1	4.58928
1	54730001	54830000	2	4.24707
1	54740001	54840000	2	4.24707
1	54750001	54850000	2	4.24707
1	54760001	54860000	1	6.3793
1	54770001	54870000	1	3.5862
1	54780001	54880000	1	3.5862
1	54790001	54890000	1	3.5862
1	54800001	54900000	1	3.5862
1	54810001	54910000	1	3.5862
1	54820001	54920000	1	3.5862
1	54900001	55000000	1	9.17241
1	54910001	55010000	1	9.17241
1	54920001	55020000	2	7.06899
1	54930001	55030000	2	5.67243
1	54940001	55040000	2	5.67243
1	54950001	55050000	3	5.4368
1	54960001	55060000	3	5.4368
1	54970001	55070000	4	4.62067
1	54980001	55080000	4	4.62067
1	54990001	55090000	5	4.68966
1	55000001	55100000	4	4.96552
1	55010001	55110000	4	4.96552
1	55020001	55120000	3	4.96551
1	55030001	55130000	3	4.96551
1	55040001	55140000	3	4.96551
1	55050001	55150000	2	4.96553
1	55060001	55160000	2	4.96553
1	55070001	55170000	1	4.96551
1	55080001	55180000	2	4.27587
1	55090001	55190000	1	3.5862
1	55100001	55200000	2	4.27587
1	55110001	55210000	2	4.27587
1	55120001	55220000	2	4.27587
1	55130001	55230000	3	4.50575
1	55140001	55240000	3	4.50575
1	55150001	55250000	4	4.27586
1	55160001	55260000	4	4.27586
1	55170001	55270000	4	4.27586
1	55180001	55280000	3	4.50575
1	55190001	55290000	3	4.50575
1	55200001	55300000	2	4.27587
1	55210001	55310000	2	4.27587
1	55220001	55320000	2	4.27587
1	55230001	55330000	2	3.58622
1	55240001	55340000	2	3.58622
1	55250001	55350000	1	3.5862
1	55260001	55360000	2	4.27587
1	55270001	55370000	2	4.27587
1	55280001	55380000	2	4.27587
1	55290001	55390000	2	4.27587
1	55300001	55400000	2	4.27587
1	55310001	55410000	3	3.92984
1	55320001	55420000	3	3.92984
1	55330001	55430000	2	4.04707
1	55340001	55440000	2	4.04707
1	55350001	55450000	2	4.04707
1	55360001	55460000	1	3.57142
1	55370001	55470000	1	3.57142
1	55380001	55480000	1	3.57142
1	55390001	55490000	1	3.57142
1	55400001	55500000	1	3.57142
1	55410001	55510000	1	4.96551
1	55420001	55520000	1	4.96551
1	55430001	55530000	1	4.96551
1	55440001	55540000	1	4.96551
1	55450001	55550000	1	4.96551
1	55460001	55560000	2	4.96553
1	55470001	55570000	2	4.96553
1	55480001	55580000	2	4.96553
1	55490001	55590000	2	4.96553
1	55500001	55600000	2	4.96553
1	55510001	55610000	1	4.96551
1	55520001	55620000	2	4.96553
1	55530001	55630000	2	4.96553
1	55540001	55640000	2	4.96553
1	55550001	55650000	2	4.96553
1	55560001	55660000	2	4.96553
1	55570001	55670000	2	4.96553
1	55580001	55680000	2	4.96553
1	55590001	55690000	2	4.96553
1	55600001	55700000	2	4.96553
1	55610001	55710000	3	4.2807
1	55620001	55720000	2	4.04707
1	55630001	55730000	3	3.85814
1	55640001	55740000	3	3.85814
1	55650001	55750000	4	4.14706
1	55660001	55760000	3	3.97874
1	55670001	55770000	3	3.97874
1	55680001	55780000	3	3.97874
1	55690001	55790000	3	3.97874
1	55700001	55800000	3	3.97874
1	55710001	55810000	2	4.24707
1	55720001	55820000	2	4.24707
1	55730001	55830000	1	5.55172
1	55740001	55840000	1	5.55172
1	55760001	55860000	1	6.51724
1	55770001	55870000	1	6.51724
1	55780001	55880000	1	6.51724
1	55790001	55890000	1	6.51724
1	55800001	55900000	2	3.69412
1	55810001	55910000	2	3.69412
1	55820001	55920000	2	3.69412
1	55830001	55930000	2	3.69412
1	55840001	55940000	2	5.38823
1	55850001	55950000	2	5.38823
1	55860001	55960000	1	4.80356
1	55870001	55970000	2	4.85883
1	55880001	55980000	2	4.85883
1	55890001	55990000	2	4.85883
1	55900001	56000000	1	9.93103
1	55910001	56010000	2	5.61176
1	55920001	56020000	2	5.61176
1	55930001	56030000	2	5.61176
1	55940001	56040000	2	3.91765
1	55950001	56050000	2	3.91765
1	55960001	56060000	2	3.91765
1	55970001	56070000	1	3.37499
1	55980001	56080000	1	3.37499
1	55990001	56090000	2	3.37501
1	56000001	56100000	2	3.37501
1	56010001	56110000	1	3.37499
1	56020001	56120000	1	3.37499
1	56030001	56130000	1	3.37499
1	56040001	56140000	2	3.91765
1	56050001	56150000	2	3.91765
1	56060001	56160000	2	3.91765
1	56070001	56170000	2	3.91765
1	56080001	56180000	2	3.91765
1	56090001	56190000	1	4.96551
1	56100001	56200000	2	4.96553
1	56110001	56210000	2	4.96553
1	56120001	56220000	2	4.96553
1	56130001	56230000	2	4.96553
1	56140001	56240000	1	4.96551
1	56150001	56250000	2	4.96553
1	56160001	56260000	2	4.96553
1	56170001	56270000	2	4.96553
1	56290001	56390000	4	2.2602
1	56300001	56400000	3	4.31548
1	56310001	56410000	4	4.41116
1	56320001	56420000	4	4.41116
1	56330001	56430000	5	3.92921
1	56340001	56440000	4	4.04706
1	56350001	56450000	5	2.30711
1	56840001	56940000	1	7.17241
1	56850001	56950000	1	7.17241
1	56860001	56960000	1	7.17241
1	56870001	56970000	1	7.17241
1	56880001	56980000	1	7.17241
1	57170001	57270000	1	2.37947
1	57180001	57280000	1	2.84375
1	57190001	57290000	1	2.37947
1	57690001	57790000	1	6.3793
1	57700001	57800000	1	6.3793
1	57710001	57810000	1	6.3793
1	57720001	57820000	1	6.3793
1	57730001	57830000	1	6.3793
1	57740001	57840000	1	2.7931
1	57890001	57990000	1	2.57333
1	57960001	58060000	1	2.48
1	58000001	58100000	1	2.29193
1	58010001	58110000	1	2.29193
1	58020001	58120000	1	2.29193
1	58030001	58130000	1	2.29193
1	58160001	58260000	1	2.51553
1	58170001	58270000	1	2.51553
1	58180001	58280000	1	2.51553
1	58610001	58710000	2	2.56934
1	58620001	58720000	2	2.9781
1	58630001	58730000	2	2.21898
1	58640001	58740000	2	2.21898
1	58650001	58750000	1	2.46913
1	58660001	58760000	1	2.46913
1	58670001	58770000	2	2.22839
1	58680001	58780000	1	2.67901
1	58690001	58790000	1	2.67901
1	58700001	58800000	1	2.67901
1	58710001	58810000	1	2.67901
1	64000001	64100000	1	3.12
1	64010001	64110000	1	3.12
1	82250001	82350000	2	2.28572
1	82260001	82360000	2	2.28572
1	82270001	82370000	2	2.28572
1	82280001	82380000	1	3.57142
1	82290001	82390000	1	3.57142
1	82300001	82400000	1	3.57142
1	82310001	82410000	1	3.57142
1	82590001	82690000	1	3.73213
1	82600001	82700000	2	2.65625
1	82610001	82710000	2	2.65625
1	82620001	82720000	2	2.65625
1	82630001	82730000	2	2.65625
1	82640001	82740000	2	2.65625
1	82650001	82750000	3	2.42802
1	82760001	82860000	2	2.65625
1	82770001	82870000	1	3.73213
1	82780001	82880000	1	3.73213
1	82790001	82890000	1	3.73213
1	82800001	82900000	2	2.65625
1	82810001	82910000	2	2.65625
1	82820001	82920000	2	2.65625
1	82830001	82930000	3	2.42802
1	82840001	82940000	3	2.42802
1	82850001	82950000	3	2.42802
1	82930001	83030000	2	2.65625
1	82940001	83040000	3	2.42802
1	82950001	83050000	3	2.42802
1	82960001	83060000	3	2.42802
1	82970001	83070000	2	2.65625
1	82980001	83080000	2	2.65625
1	82990001	83090000	2	2.65625
1	83000001	83100000	2	2.65625
1	83010001	83110000	2	2.65625
1	83020001	83120000	2	2.65625
1	87640001	87740000	1	2.23457
1	87650001	87750000	1	2.23457
1	87660001	87760000	1	2.23457
1	87670001	87770000	1	2.23457
1	87680001	87780000	1	2.23457
1	87690001	87790000	1	2.23457
1	87700001	87800000	1	2.23457
1	88000001	88100000	1	2.23457
1	88050001	88150000	1	4.57142
1	88060001	88160000	1	3.57142
1	88070001	88170000	1	3.57142
1	88080001	88180000	1	5.01784
1	88090001	88190000	1	5.01784
1	88100001	88200000	1	5.01784
1	88110001	88210000	1	5.01784
1	88120001	88220000	1	5.01784
1	88130001	88230000	1	5.01784
1	88140001	88240000	1	5.01784
1	89530001	89630000	1	2.87499
1	89540001	89640000	1	2.87499
1	89550001	89650000	2	2.875
1	89560001	89660000	2	2.875
1	89570001	89670000	2	2.875
1	89580001	89680000	2	2.875
1	89590001	89690000	2	2.875
1	89600001	89700000	2	2.875
1	89610001	89710000	2	2.875
1	89620001	89720000	2	2.875
1	89630001	89730000	1	2.87499
1	89640001	89740000	1	2.87499
1	93020001	93120000	1	2.87499
1	93030001	93130000	1	2.87499
1	93040001	93140000	1	2.87499
1	93050001	93150000	1	2.87499
1	106430001	106530000	3	2.1752
1	106440001	106540000	2	4.96553
1	106450001	106550000	2	4.96553
1	106460001	106560000	2	4.96553
1	106470001	106570000	2	4.96553
1	106480001	106580000	2	4.96553
1	106490001	106590000	2	4.96553
1	106500001	106600000	2	4.96553
1	106510001	106610000	1	4.96551
1	106960001	107060000	1	2.192
1	106970001	107070000	1	2.192
1	106980001	107080000	1	3.92002
1	106990001	107090000	1	3.688
1	107000001	107100000	1	3.688
1	107010001	107110000	1	3.688
1	107130001	107230000	1	7.62069
1	107140001	107240000	1	7.62069
1	107150001	107250000	1	7.62069
1	107160001	107260000	1	7.62069
1	107170001	107270000	1	7.62069
1	107180001	107280000	1	7.62069
1	107190001	107290000	2	7.62069
1	107200001	107300000	2	7.62069
1	107210001	107310000	2	7.62069
1	107220001	107320000	2	7.62069
1	107230001	107330000	1	7.62069
1	107240001	107340000	1	7.62069
1	107280001	107380000	2	2.32806
1	107290001	107390000	2	2.3083
1	107300001	107400000	2	2.3083
1	107310001	107410000	2	2.3083
1	107320001	107420000	2	2.3083
1	107330001	107430000	2	2.3083
1	107340001	107440000	2	2.3083
1	107350001	107450000	1	12.4138
1	107360001	107460000	1	12.4138
1	107370001	107470000	1	13.4138
1	107380001	107480000	1	8.44827
1	107390001	107490000	1	8.44827
1	107400001	107500000	1	8.44827
1	107410001	107510000	1	8.44827
1	107420001	107520000	2	8.03447
1	107430001	107530000	2	8.03447
1	107440001	107540000	2	8.03447
1	107450001	107550000	3	7.89655
1	107460001	107560000	3	7.89655
1	107470001	107570000	3	7.5632
1	107480001	107580000	4	2.83602
1	107490001	107590000	3	2.36169
1	107500001	107600000	3	2.36169
1	107510001	107610000	3	2.36169
1	107730001	107830000	4	2.32552
1	107740001	107840000	4	2.32552
1	107750001	107850000	4	2.32552
1	107760001	107860000	4	2.32552
1	107770001	107870000	3	4.00001
1	107780001	107880000	3	4.00001
1	107790001	107890000	2	4.00002
1	107800001	107900000	2	4.00002
1	107810001	107910000	1	3.99999
1	108060001	108160000	2	3.28572
1	108070001	108170000	2	3.28572
1	108080001	108180000	2	3.28572
1	108090001	108190000	1	2.57142
1	108310001	108410000	1	6.51724
1	108320001	108420000	1	6.51724
1	108330001	108430000	1	6.51724
1	108340001	108440000	1	6.51724
1	108350001	108450000	1	6.51724
1	108360001	108460000	1	6.51724
1	108370001	108470000	1	6.51724
1	108380001	108480000	1	6.51724
1	108390001	108490000	1	6.51724
1	108400001	108500000	1	6.51724
1	111170001	111270000	2	2.36208
1	111180001	111280000	2	2.36208
1	111190001	111290000	2	2.36208
1	111200001	111300000	2	2.36208
1	111210001	111310000	2	2.36208
1	111220001	111320000	2	2.36208
1	111230001	111330000	2	2.36208
1	111240001	111340000	2	2.36208
1	111250001	111350000	2	2.36208
1	111260001	111360000	2	2.36208
1	111310001	111410000	2	2.36208
1	111320001	111420000	2	2.36208
1	111330001	111430000	2	2.36208
1	111340001	111440000	2	2.36208
1	111350001	111450000	2	2.36208
1	112030001	112130000	2	2.66666
1	112040001	112140000	2	3.01235
1	112050001	112150000	2	3.35801
1	112060001	112160000	2	3.35801
1	112070001	112170000	2	3.35801
1	112080001	112180000	2	3.35801
1	112090001	112190000	2	3.35801
1	112100001	112200000	2	3.35801
1	112110001	112210000	1	4.04938
1	112150001	112250000	1	2.58025
1	112160001	112260000	1	2.58025
1	112170001	112270000	1	2.58025
1	112180001	112280000	1	2.58025
1	112190001	112290000	1	2.58025
1	112780001	112880000	1	3.71605
1	112790001	112890000	1	3.71605
1	112800001	112900000	1	3.71605
1	112810001	112910000	1	3.71605
1	112820001	112920000	1	3.71605
1	112830001	112930000	1	3.71605
1	112840001	112940000	1	3.71605
1	112850001	112950000	1	3.71605
1	112860001	112960000	1	3.02469
1	112870001	112970000	1	3.02469
1	113460001	113560000	1	2.33333
1	113470001	113570000	1	2.33333
1	113480001	113580000	1	2.33333
1	113490001	113590000	1	2.33333
1	113500001	113600000	1	2.33333
1	113510001	113610000	1	2.33333
1	113520001	113620000	1	2.33333
1	113530001	113630000	1	2.33333
1	113540001	113640000	1	2.33333
1	113550001	113650000	1	2.33333
1	115420001	115520000	1	4.31034
1	115430001	115530000	1	4.31034
1	115440001	115540000	1	4.31034
1	115450001	115550000	1	4.31034
1	115460001	115560000	1	4.31034
1	115470001	115570000	2	4.31036
1	115480001	115580000	2	4.31036
1	115490001	115590000	2	4.31036
1	115500001	115600000	2	4.31036
1	115510001	115610000	3	4.31034
1	115520001	115620000	2	4.31036
1	115530001	115630000	2	4.31036
1	115540001	115640000	2	4.31036
1	115550001	115650000	2	4.31036
1	115560001	115660000	2	4.31036
1	115570001	115670000	1	4.31034
1	115580001	115680000	1	4.31034
1	115690001	115790000	1	4.31034
1	115700001	115800000	1	4.31034
1	117310001	117410000	1	2.47116
1	129520001	129620000	1	3.14285
1	129530001	129630000	1	3.14285
1	133090001	133190000	1	2.7931
1	133100001	133200000	1	2.7931
1	133110001	133210000	1	2.7931
1	133120001	133220000	1	2.7931
1	133130001	133230000	1	2.7931
1	133140001	133240000	1	2.7931
1	133150001	133250000	1	2.7931
1	133500001	133600000	1	3.5862
1	133510001	133610000	1	3.5862
1	133520001	133620000	1	3.5862
1	133530001	133630000	1	3.5862
1	133540001	133640000	1	3.5862
1	133550001	133650000	1	3.5862
1	133560001	133660000	1	3.5862
1	133570001	133670000	1	3.5862
1	133580001	133680000	1	3.5862
1	133590001	133690000	1	3.5862
1	133980001	134080000	1	3.5862
1	133990001	134090000	1	3.5862
1	134000001	134100000	1	3.5862
1	134010001	134110000	1	3.5862
1	142040001	142140000	1	2.17284
1	142050001	142150000	1	2.17284
1	142060001	142160000	1	2.17284
1	142070001	142170000	1	2.17284
1	142080001	142180000	1	2.17284
1	142090001	142190000	1	2.17284
1	142100001	142200000	1	2.17284
1	142110001	142210000	1	2.17284
1	142120001	142220000	1	2.17284
1	142130001	142230000	1	2.17284
1	142200001	142300000	1	4.96551
1	142210001	142310000	1	4.96551
1	142360001	142460000	1	6.06897
1	142370001	142470000	2	5.81036
1	142380001	142480000	2	5.81036
1	142390001	142490000	2	5.81036
1	142400001	142500000	2	5.81036
1	142410001	142510000	2	5.81036
1	142420001	142520000	2	5.81036
1	142430001	142530000	2	5.81036
1	142440001	142540000	1	5.55172
1	142450001	142550000	1	5.55172
1	142460001	142560000	1	5.55172
1	143270001	143370000	1	6.51724
1	143280001	143380000	1	6.51724
1	143290001	143390000	1	6.51724
1	143300001	143400000	1	6.51724
1	143310001	143410000	1	6.51724
1	143320001	143420000	1	6.51724
1	143330001	143430000	1	6.51724
1	143340001	143440000	1	6.51724
1	143350001	143450000	1	6.51724
1	143360001	143460000	1	6.51724
1	144500001	144600000	3	2.32389
1	144510001	144610000	3	2.32389
1	144540001	144640000	3	2.32389
1	144550001	144650000	3	2.32389
1	144560001	144660000	3	2.32389
1	144570001	144670000	3	2.32389
1	144850001	144950000	1	3.57142
1	144860001	144960000	1	3.57142
1	144870001	144970000	1	3.57142
1	144880001	144980000	1	3.57142
1	144890001	144990000	1	3.57142
1	144900001	145000000	1	3.57142
1	144910001	145010000	1	3.57142
1	144920001	145020000	1	3.57142
1	144930001	145030000	1	3.57142
1	144940001	145040000	1	3.57142
1	145030001	145130000	1	3.57142
1	145040001	145140000	2	3.57143
1	145050001	145150000	3	3.57143
1	145060001	145160000	3	3.57143
1	145070001	145170000	3	3.57143
1	145080001	145180000	3	3.57143
1	145090001	145190000	3	3.57143
1	145100001	145200000	3	3.57143
1	145110001	145210000	3	3.57143
1	145120001	145220000	3	3.57143
1	145130001	145230000	2	3.57143
1	145140001	145240000	1	3.57142
1	145180001	145280000	1	6.51724
1	145190001	145290000	1	6.51724
1	145200001	145300000	1	6.51724
1	145210001	145310000	1	6.51724
1	145220001	145320000	1	6.51724
1	145230001	145330000	2	6.51726
1	145240001	145340000	2	6.51726
1	145250001	145350000	2	6.51726
1	145260001	145360000	2	6.51726
1	145270001	145370000	2	6.51726
1	145280001	145380000	1	6.51724
1	145290001	145390000	1	6.51724
1	145300001	145400000	1	6.51724
1	145310001	145410000	1	6.51724
1	145320001	145420000	1	6.51724
1	145340001	145440000	1	6.51724
1	145350001	145450000	1	6.51724
1	145360001	145460000	2	2.38728
1	145370001	145470000	3	2.67686
1	145380001	145480000	3	2.67686
1	145390001	145490000	3	2.67686
1	145400001	145500000	3	2.67686
1	145410001	145510000	3	2.67686
1	145420001	145520000	3	2.67686
1	145430001	145530000	3	2.67686
1	145460001	145560000	1	3.57142
1	145470001	145570000	1	3.94642
1	145480001	145580000	1	3.94642
1	145490001	145590000	1	3.94642
1	145500001	145600000	1	3.94642
1	145510001	145610000	1	3.94642
1	145520001	145620000	1	3.94642
1	145530001	145630000	1	3.94642
1	145540001	145640000	1	3.94642
1	145550001	145650000	1	3.94642
1	145560001	145660000	1	3.94642
1	145780001	145880000	1	3.85713
1	145790001	145890000	1	3.85713
1	145800001	145900000	1	3.85713
1	145810001	145910000	1	3.85713
1	145820001	145920000	2	3.85715
1	145830001	145930000	2	3.85715
1	145840001	145940000	2	3.85715
1	145850001	145950000	2	3.85715
1	145860001	145960000	2	3.85715
1	145870001	145970000	2	3.85715
1	145880001	145980000	1	3.85713
1	145890001	145990000	1	3.85713
1	145900001	146000000	1	3.85713
1	145910001	146010000	1	3.85713
1	146150001	146250000	3	2.79311
1	146160001	146260000	3	2.79311
1	146210001	146310000	5	2.1579
1	146240001	146340000	6	2.22463
1	146250001	146350000	5	2.1579
1	146260001	146360000	5	2.1579
1	146270001	146370000	4	3.16083
1	146280001	146380000	4	3.16083
1	146290001	146390000	3	2.79311
1	146300001	146400000	3	2.79311
1	146310001	146410000	2	2.79311
1	146320001	146420000	2	2.79311
1	146330001	146430000	2	2.79311
1	147020001	147120000	1	4.96551
1	147030001	147130000	2	4.63794
1	147040001	147140000	2	4.63794
1	147050001	147150000	2	4.63794
1	147060001	147160000	2	4.63794
1	147070001	147170000	3	2.4317
1	147080001	147180000	3	2.4317
1	147420001	147520000	1	3.37499
1	147430001	147530000	1	3.37499
1	147440001	147540000	1	3.37499
1	147790001	147890000	1	4.31034
1	147800001	147900000	1	4.31034
1	147810001	147910000	1	4.31034
1	147820001	147920000	1	4.31034
1	147830001	147930000	1	4.31034
1	147840001	147940000	1	4.31034
1	147850001	147950000	1	4.31034
1	147860001	147960000	1	4.31034
1	147870001	147970000	2	4.07059
1	147880001	147980000	3	4.13158
1	147890001	147990000	2	4.07059
1	147900001	148000000	2	4.07059
1	147910001	148010000	2	4.07059
1	147920001	148020000	2	4.07059
1	147930001	148030000	2	4.07059
1	147940001	148040000	2	4.07059
1	147950001	148050000	2	4.07059
1	147960001	148060000	2	4.07059
1	147970001	148070000	1	4.31034
1	148330001	148430000	1	2.57142
1	148340001	148440000	1	2.57142
1	148350001	148450000	1	2.57142
1	148360001	148460000	1	2.57142
1	148370001	148470000	1	2.57142
1	148380001	148480000	1	2.57142
1	148390001	148490000	2	2.40179
1	148400001	148500000	2	2.40179
1	148410001	148510000	2	2.40179
1	148420001	148520000	2	2.40179
1	148430001	148530000	1	2.23213
1	148440001	148540000	1	2.23213
1	148450001	148550000	1	2.23213
1	148460001	148560000	1	2.23213
1	148470001	148570000	1	2.23213
1	148480001	148580000	1	2.23213
1	148520001	148620000	1	3.14285
1	148530001	148630000	1	3.14285
1	148540001	148640000	1	3.14285
1	148550001	148650000	1	3.14285
1	148560001	148660000	1	3.14285
1	148570001	148670000	1	3.14285
1	148590001	148690000	3	2.14634
1	148600001	148700000	3	2.14634
1	148610001	148710000	3	2.14634
1	148620001	148720000	3	2.41095
1	148630001	148730000	3	2.41095
1	148640001	148740000	3	2.41095
1	148650001	148750000	3	2.41095
1	148660001	148760000	4	2.83871
1	148670001	148770000	4	2.83871
1	148680001	148780000	4	2.28571
1	149060001	149160000	1	5.55172
1	149070001	149170000	1	5.55172
1	149080001	149180000	1	5.55172
1	149090001	149190000	1	5.55172
1	149100001	149200000	1	5.55172
1	149110001	149210000	1	5.55172
1	150710001	150810000	2	2.16234
1	150720001	150820000	2	2.16234
1	150730001	150830000	2	2.16234
1	150740001	150840000	1	4.96551
1	152450001	152550000	2	2.40602
1	152460001	152560000	2	2.40602
1	152470001	152570000	2	2.40602
1	152480001	152580000	2	2.40602
1	152490001	152590000	2	2.40602
1	152500001	152600000	2	2.40602
1	152510001	152610000	2	2.40602
1	152520001	152620000	2	2.40602
1	152530001	152630000	2	2.40602
1	152540001	152640000	2	2.40602
1	152550001	152650000	1	4.96551
1	152560001	152660000	1	4.96551
1	152570001	152670000	1	4.96551
1	152580001	152680000	1	4.96551
1	152590001	152690000	1	4.96551
1	152600001	152700000	1	4.96551
1	152610001	152710000	1	4.96551
1	152620001	152720000	1	4.96551
1	152630001	152730000	1	4.96551
1	152640001	152740000	1	4.96551
1	153220001	153320000	1	5.55172
1	153230001	153330000	1	5.55172
1	153240001	153340000	1	5.55172
1	153250001	153350000	1	5.55172
1	153260001	153360000	1	5.55172
1	153270001	153370000	1	5.55172
1	153280001	153380000	1	5.55172
1	153290001	153390000	1	5.55172
1	153300001	153400000	1	5.55172
1	153310001	153410000	1	5.55172
1	153570001	153670000	2	2.53384
1	153580001	153680000	2	2.53384
1	153590001	153690000	2	2.53384
1	153600001	153700000	1	5.55172
1	153610001	153710000	1	5.55172
1	153620001	153720000	1	5.55172
1	153630001	153730000	1	5.55172
1	153640001	153740000	1	5.55172
1	153650001	153750000	1	5.55172
1	153660001	153760000	1	5.55172
1	153710001	153810000	1	6.06897
1	153720001	153820000	1	6.06897
1	153730001	153830000	1	6.06897
1	153740001	153840000	1	6.06897
1	153750001	153850000	1	6.06897
1	153760001	153860000	1	6.06897
1	153770001	153870000	1	6.06897
1	153780001	153880000	1	6.06897
1	153790001	153890000	1	6.06897
1	153800001	153900000	1	6.06897
1	153850001	153950000	1	6.06897
1	153860001	153960000	1	6.06897
1	153870001	153970000	1	6.06897
1	153880001	153980000	1	6.06897
1	153890001	153990000	1	6.06897
1	153900001	154000000	1	6.06897
1	153910001	154010000	1	6.06897
1	153920001	154020000	1	6.06897
1	153930001	154030000	1	6.06897
1	153940001	154040000	1	6.06897
1	153980001	154080000	1	6.06897
1	153990001	154090000	1	6.06897
1	154000001	154100000	1	6.06897
1	154010001	154110000	1	6.06897
1	154020001	154120000	1	6.06897
1	154030001	154130000	1	6.06897
1	154040001	154140000	1	6.06897
1	154050001	154150000	1	6.06897
1	154060001	154160000	1	6.06897
1	154070001	154170000	1	6.06897
1	154090001	154190000	1	6.51724
1	154100001	154200000	1	6.51724
1	154110001	154210000	1	6.51724
1	154120001	154220000	1	6.51724
1	154130001	154230000	1	6.51724
1	154140001	154240000	2	6.51726
1	154150001	154250000	2	6.51726
1	154160001	154260000	2	6.51726
1	154170001	154270000	2	6.51726
1	154180001	154280000	2	6.51726
1	154190001	154290000	1	6.51724
1	154200001	154300000	1	6.51724
1	154210001	154310000	1	6.51724
1	154220001	154320000	1	6.51724
1	154230001	154330000	1	6.51724
1	154250001	154350000	1	5.55172
1	154260001	154360000	1	5.55172
1	154270001	154370000	1	5.55172
1	154280001	154380000	1	5.55172
1	154290001	154390000	1	5.55172
1	154300001	154400000	2	5.55174
1	154310001	154410000	2	5.55174
1	154320001	154420000	2	5.55174
1	154330001	154430000	2	5.55174
1	154340001	154440000	2	5.55174
1	154350001	154450000	1	5.55172
1	154360001	154460000	1	5.55172
1	154370001	154470000	1	5.55172
1	154380001	154480000	1	5.55172
1	154390001	154490000	1	5.55172
1	154480001	154580000	1	5.55172
1	154490001	154590000	1	5.55172
1	154500001	154600000	1	5.55172
1	154510001	154610000	1	5.55172
1	154520001	154620000	1	5.55172
1	154530001	154630000	1	5.55172
1	154540001	154640000	1	5.55172
1	154550001	154650000	1	5.55172
1	154560001	154660000	1	5.55172
1	154570001	154670000	1	5.55172
1	154600001	154700000	1	5.55172
1	154610001	154710000	1	5.55172
1	154620001	154720000	1	5.55172
1	154630001	154730000	1	5.55172
1	154640001	154740000	1	5.55172
1	154650001	154750000	1	5.55172
1	154660001	154760000	1	5.55172
1	154670001	154770000	1	5.55172
1	154680001	154780000	1	5.55172
1	154690001	154790000	1	5.55172
1	154830001	154930000	1	5.55172
1	154840001	154940000	1	5.55172
1	154850001	154950000	1	5.55172
1	154860001	154960000	1	5.55172
1	154870001	154970000	2	5.55174
1	154880001	154980000	2	5.55174
1	154890001	154990000	2	5.55174
1	154900001	155000000	2	5.55174
1	154910001	155010000	2	5.55174
1	154920001	155020000	2	5.55174
1	154930001	155030000	1	5.55172
1	154940001	155040000	1	5.55172
1	154950001	155050000	1	5.55172
1	154960001	155060000	1	5.55172
1	155530001	155630000	2	2.90179
1	155540001	155640000	1	4.80356
1	155550001	155650000	1	4.80356
1	155560001	155660000	2	2.90179
1	155570001	155670000	2	2.90179
1	155580001	155680000	3	2.26786
1	155590001	155690000	3	2.26786
1	155600001	155700000	3	2.26786
1	155610001	155710000	2	2.28572
1	155620001	155720000	2	2.28572
1	155650001	155750000	2	2.28572
1	155660001	155760000	1	3.57142
1	155670001	155770000	1	3.57142
1	155810001	155910000	1	10.8571
1	155820001	155920000	1	10.8571
1	155830001	155930000	1	10.8571
1	155840001	155940000	1	8.28572
1	155850001	155950000	1	10.1429
1	155860001	155960000	1	10.1429
1	155870001	155970000	1	7.57141
1	155880001	155980000	1	7.57141
1	155890001	155990000	2	3.42858
1	155900001	156000000	2	3.42858
1	155910001	156010000	1	3.71428
1	155920001	156020000	2	2.78572
1	155930001	156030000	2	2.78572
1	155940001	156040000	2	2.78572
1	155960001	156060000	3	2.49645
1	155970001	156070000	3	2.49645
1	155980001	156080000	4	2.91764
1	155990001	156090000	3	3.43859
1	156000001	156100000	3	3.43859
1	156010001	156110000	4	3.74824
1	156020001	156120000	3	4.96551
1	156030001	156130000	3	4.96551
1	156040001	156140000	3	4.96551
1	156050001	156150000	3	4.96551
1	156060001	156160000	2	4.96553
1	156070001	156170000	2	4.96553
1	156080001	156180000	1	4.96551
1	156090001	156190000	1	4.96551
1	156100001	156200000	1	4.96551
1	156450001	156550000	1	2.37499
1	156760001	156860000	1	4.96551
1	156770001	156870000	1	4.96551
1	156780001	156880000	1	4.96551
1	156790001	156890000	1	4.96551
1	156800001	156900000	1	4.96551
1	156810001	156910000	1	4.96551
1	156820001	156920000	1	4.96551
1	156830001	156930000	1	4.96551
1	156840001	156940000	1	4.96551
1	156850001	156950000	1	4.96551
1	156950001	157050000	1	3.30356
1	156960001	157060000	1	3.30356
1	157150001	157250000	1	2.23213
1	157160001	157260000	1	2.23213
1	157170001	157270000	1	2.23213
1	157180001	157280000	1	3.23213
1	157190001	157290000	1	3.23213
1	157200001	157300000	1	3.23213
1	157230001	157330000	1	6.89655
1	157240001	157340000	1	6.89655
1	157250001	157350000	1	6.89655
1	157260001	157360000	1	6.89655
1	157270001	157370000	1	6.89655
1	157280001	157380000	1	4.96551
1	157290001	157390000	1	4.96551
1	157300001	157400000	1	4.96551
1	157310001	157410000	2	4.63794
1	157320001	157420000	2	4.63794
1	157330001	157430000	1	4.31034
1	157340001	157440000	1	4.31034
1	157350001	157450000	1	4.31034
1	157360001	157460000	1	4.31034
1	157370001	157470000	1	4.31034
1	157380001	157480000	1	4.31034
1	157390001	157490000	1	4.31034
1	157400001	157500000	1	4.31034
1	157840001	157940000	1	2.69231
1	157850001	157950000	1	2.69231
1	157860001	157960000	1	3.69232
1	157870001	157970000	1	4.69232
1	157880001	157980000	1	4.69232
1	160760001	160860000	1	2.57142
1	160770001	160870000	1	2.57142
1	161390001	161490000	1	2.23213
1	161400001	161500000	1	2.23213
1	161410001	161510000	1	2.23213
1	161420001	161520000	1	2.23213
1	161430001	161530000	1	2.23213
1	161440001	161540000	1	2.23213
1	161450001	161550000	1	2.23213
1	161460001	161560000	1	2.23213
1	161470001	161570000	1	2.23213
1	161480001	161580000	1	2.23213
1	161490001	161590000	1	2.7931
1	161500001	161600000	1	2.7931
1	161510001	161610000	1	2.7931
1	161520001	161620000	1	2.7931
1	161530001	161630000	1	2.7931
1	161540001	161640000	1	2.7931
1	161550001	161650000	3	2.79311
1	161560001	161660000	3	2.79311
1	161570001	161670000	3	2.79311
1	161580001	161680000	3	2.79311
1	161590001	161690000	2	2.79311
1	161600001	161700000	3	2.79311
1	161610001	161710000	3	2.79311
1	161620001	161720000	3	2.79311
1	161630001	161730000	3	2.79311
1	161640001	161740000	3	2.79311
1	161650001	161750000	1	2.7931
1	161660001	161760000	1	2.7931
1	161670001	161770000	2	2.79311
1	161680001	161780000	2	2.79311
1	161690001	161790000	2	2.79311
1	161700001	161800000	1	2.7931
1	161710001	161810000	1	2.7931
1	161720001	161820000	1	2.7931
1	161730001	161830000	1	2.7931
1	161740001	161840000	1	5.58621
1	161750001	161850000	1	5.58621
1	161760001	161860000	1	5.58621
1	161780001	161880000	1	5.58621
1	161790001	161890000	2	5.27587
1	161800001	161900000	3	5.1724
1	161810001	161910000	3	5.1724
1	161820001	161920000	3	5.1724
1	161830001	161930000	3	5.1724
1	161840001	161940000	3	4.24138
1	161850001	161950000	3	4.24138
1	161860001	161960000	3	4.24138
1	161870001	161970000	3	4.24138
1	161880001	161980000	2	4.96553
1	161890001	161990000	1	4.96551
1	162070001	162170000	1	2.7931
1	162080001	162180000	1	2.7931
1	162090001	162190000	1	2.7931
1	162100001	162200000	1	2.7931
1	162110001	162210000	1	2.7931
1	162120001	162220000	1	2.7931
1	162130001	162230000	3	2.79311
1	162140001	162240000	3	2.79311
1	162150001	162250000	3	2.79311
1	162160001	162260000	4	2.7931
1	162170001	162270000	3	3.72414
1	162180001	162280000	3	4.65517
1	162190001	162290000	3	4.65517
1	162200001	162300000	3	4.65517
1	162210001	162310000	3	4.65517
1	162220001	162320000	3	4.65517
1	162230001	162330000	1	8.37931
1	162240001	162340000	1	8.37931
1	162250001	162350000	1	8.37931
1	162320001	162420000	1	4.96551
1	162330001	162430000	1	4.96551
1	162340001	162440000	1	7.75861
1	162350001	162450000	1	7.75861
1	162360001	162460000	2	6.36209
1	162370001	162470000	2	6.36209
1	162380001	162480000	2	6.36209
1	162390001	162490000	2	6.36209
[truncated: 8,020 more rows]
