# Supplementary material for: Genome-wide single nucleotide polymorphism (SNP) data reveal potential candidate genes for litter traits in a Yorkshire pig population
Source: Copernicus journal article supplement (doi:10.5194/aab-66-357-2023), 2023-11-23
Supplement: Supplementary file 6 [file Table S3.xlsx]

## Sheet: Table S3_Fst_S
Table S3. Statistical results of FST between the HP and LP sows.
CHROM	BIN_START	BIN_END	WEIGHTED_FST
1	4220001	4320000	0.193878
1	4230001	4330000	0.193878
1	8290001	8390000	0.218487
1	9040001	9140000	0.182444
1	9050001	9150000	0.182444
1	9860001	9960000	0.178571
1	9870001	9970000	0.178571
1	9880001	9980000	0.178571
1	9890001	9990000	0.178571
1	9900001	10000000	0.178571
1	9910001	10010000	0.178571
1	9920001	10020000	0.178571
1	9930001	10030000	0.178571
1	9940001	10040000	0.178571
1	9950001	10050000	0.178571
1	10600001	10700000	0.15642
1	10740001	10840000	0.171358
1	10750001	10850000	0.171358
1	10760001	10860000	0.171358
1	10770001	10870000	0.171358
1	10780001	10880000	0.171358
1	10790001	10890000	0.171358
1	10800001	10900000	0.171358
1	11370001	11470000	0.191244
1	11380001	11480000	0.191244
1	11390001	11490000	0.238095
1	11400001	11500000	0.238095
1	11410001	11510000	0.238095
1	11420001	11520000	0.238095
1	11430001	11530000	0.238095
1	18390001	18490000	0.356312
1	18400001	18500000	0.319728
1	18410001	18510000	0.319728
1	18420001	18520000	0.319728
1	18430001	18530000	0.192881
1	18440001	18540000	0.192881
1	18450001	18550000	0.192881
1	18460001	18560000	0.192881
1	18470001	18570000	0.192881
1	18480001	18580000	0.192881
1	19720001	19820000	0.1524
1	19730001	19830000	0.1524
1	19740001	19840000	0.165578
1	21820001	21920000	0.168535
1	21830001	21930000	0.169985
1	21840001	21940000	0.169985
1	21850001	21950000	0.169985
1	21860001	21960000	0.168535
1	21870001	21970000	0.168535
1	24350001	24450000	0.218487
1	24360001	24460000	0.218487
1	24740001	24840000	0.149295
1	30720001	30820000	0.172474
1	30730001	30830000	0.172474
1	30850001	30950000	0.172474
1	30860001	30960000	0.172474
1	30870001	30970000	0.172474
1	30880001	30980000	0.172474
1	30890001	30990000	0.172474
1	30900001	31000000	0.172474
1	30910001	31010000	0.150649
1	30920001	31020000	0.150649
1	30930001	31030000	0.150649
1	30940001	31040000	0.150649
1	41930001	42030000	0.221748
1	41940001	42040000	0.221748
1	41950001	42050000	0.221748
1	41960001	42060000	0.221748
1	41970001	42070000	0.221748
1	41980001	42080000	0.221748
1	41990001	42090000	0.221748
1	42000001	42100000	0.242046
1	42010001	42110000	0.247752
1	42020001	42120000	0.247752
1	42030001	42130000	0.257921
1	42040001	42140000	0.257921
1	42050001	42150000	0.257921
1	42060001	42160000	0.257921
1	42070001	42170000	0.257921
1	42080001	42180000	0.257921
1	42090001	42190000	0.257921
1	42100001	42200000	0.257921
1	42110001	42210000	0.221748
1	42120001	42220000	0.221748
1	42290001	42390000	0.221748
1	42300001	42400000	0.221748
1	42310001	42410000	0.221748
1	42320001	42420000	0.221748
1	42330001	42430000	0.192591
1	42340001	42440000	0.192591
1	42350001	42450000	0.192591
1	42360001	42460000	0.19911
1	42370001	42470000	0.19911
1	42380001	42480000	0.19911
1	42390001	42490000	0.192591
1	42400001	42500000	0.180799
1	42410001	42510000	0.180799
1	42420001	42520000	0.152992
1	42430001	42530000	0.218848
1	42440001	42540000	0.218848
1	42450001	42550000	0.218848
1	42460001	42560000	0.216544
1	42470001	42570000	0.216544
1	42480001	42580000	0.216544
1	42490001	42590000	0.216544
1	42500001	42600000	0.216544
1	42510001	42610000	0.216544
1	42520001	42620000	0.216544
1	42710001	42810000	0.154324
1	42720001	42820000	0.154324
1	42730001	42830000	0.184565
1	42740001	42840000	0.184565
1	42750001	42850000	0.233243
1	42760001	42860000	0.244076
1	42770001	42870000	0.195127
1	42780001	42880000	0.195127
1	42790001	42890000	0.16442
1	42800001	42900000	0.16442
1	42890001	42990000	0.153533
1	42900001	43000000	0.153533
1	42910001	43010000	0.153533
1	42920001	43020000	0.245392
1	42930001	43030000	0.245392
1	42940001	43040000	0.245392
1	42950001	43050000	0.209909
1	42960001	43060000	0.185556
1	43480001	43580000	0.278536
1	43490001	43590000	0.278536
1	43500001	43600000	0.278536
1	43510001	43610000	0.278536
1	43520001	43620000	0.278536
1	43530001	43630000	0.278536
1	43540001	43640000	0.211519
1	43550001	43650000	0.211519
1	43560001	43660000	0.211519
1	43570001	43670000	0.211519
1	43640001	43740000	0.176339
1	43720001	43820000	0.156832
1	43730001	43830000	0.156832
1	43740001	43840000	0.156832
1	43750001	43850000	0.207267
1	43760001	43860000	0.207267
1	43770001	43870000	0.245392
1	43780001	43880000	0.245392
1	43790001	43890000	0.245392
1	43800001	43900000	0.245392
1	43810001	43910000	0.245392
1	43820001	43920000	0.278536
1	43830001	43930000	0.278536
1	43840001	43940000	0.278536
1	43850001	43950000	0.278536
1	43860001	43960000	0.232988
1	43870001	43970000	0.176339
1	43880001	43980000	0.232988
1	43890001	43990000	0.198842
1	43900001	44000000	0.198842
1	43910001	44010000	0.198842
1	43920001	44020000	0.179163
1	43930001	44030000	0.205814
1	43940001	44040000	0.205814
1	43950001	44050000	0.221193
1	43960001	44060000	0.230382
1	43970001	44070000	0.230382
1	43980001	44080000	0.205182
1	43990001	44090000	0.229466
1	44000001	44100000	0.229466
1	44010001	44110000	0.205182
1	44020001	44120000	0.227235
1	44030001	44130000	0.194722
1	44040001	44140000	0.194722
1	44070001	44170000	0.170622
1	44080001	44180000	0.185556
1	44090001	44190000	0.185556
1	44100001	44200000	0.185556
1	44110001	44210000	0.245392
1	44120001	44220000	0.188713
1	44130001	44230000	0.188713
1	44140001	44240000	0.153963
1	44150001	44250000	0.153963
1	44160001	44260000	0.153963
1	44200001	44300000	0.153963
1	44210001	44310000	0.153963
1	44220001	44320000	0.185556
1	44230001	44330000	0.185556
1	44240001	44340000	0.245392
1	44250001	44350000	0.245392
1	44260001	44360000	0.245392
1	44270001	44370000	0.267979
1	44280001	44380000	0.267979
1	44290001	44390000	0.267979
1	44300001	44400000	0.23913
1	44310001	44410000	0.23913
1	44320001	44420000	0.23913
1	44330001	44430000	0.211519
1	44340001	44440000	0.211519
1	44350001	44450000	0.191096
1	44360001	44460000	0.191096
1	44450001	44550000	0.164792
1	44460001	44560000	0.164792
1	44470001	44570000	0.189286
1	44480001	44580000	0.189286
1	44490001	44590000	0.189286
1	44500001	44600000	0.207267
1	44510001	44610000	0.207267
1	44520001	44620000	0.207267
1	44530001	44630000	0.207267
1	44540001	44640000	0.207267
1	44550001	44650000	0.207267
1	44560001	44660000	0.207267
1	44970001	45070000	0.207267
1	44980001	45080000	0.207267
1	44990001	45090000	0.152174
1	45000001	45100000	0.152174
1	45010001	45110000	0.152174
1	45120001	45220000	0.207267
1	45130001	45230000	0.207267
1	45140001	45240000	0.207267
1	45150001	45250000	0.207267
1	45160001	45260000	0.207267
1	45170001	45270000	0.207267
1	45180001	45280000	0.207267
1	45190001	45290000	0.207267
1	45200001	45300000	0.207267
1	45210001	45310000	0.207267
1	45270001	45370000	0.181914
1	45280001	45380000	0.181914
1	45290001	45390000	0.181914
1	45310001	45410000	0.166117
1	45320001	45420000	0.177864
1	45330001	45430000	0.177864
1	45340001	45440000	0.175599
1	45350001	45450000	0.181569
1	45360001	45460000	0.181569
1	45370001	45470000	0.173181
1	45380001	45480000	0.154904
1	45390001	45490000	0.154904
1	45400001	45500000	0.173181
1	45410001	45510000	0.156663
1	45960001	46060000	0.150364
1	45970001	46070000	0.150364
1	45980001	46080000	0.19058
1	45990001	46090000	0.19058
1	46000001	46100000	0.19058
1	46010001	46110000	0.19058
1	46020001	46120000	0.19058
1	46030001	46130000	0.239631
1	46040001	46140000	0.174541
1	46050001	46150000	0.174541
1	46180001	46280000	0.209726
1	46190001	46290000	0.209726
1	46200001	46300000	0.209726
1	46210001	46310000	0.209726
1	46220001	46320000	0.209726
1	46230001	46330000	0.208371
1	46240001	46340000	0.208371
1	46250001	46350000	0.170686
1	46260001	46360000	0.170686
1	46270001	46370000	0.170686
1	46280001	46380000	0.172662
1	46290001	46390000	0.172662
1	46300001	46400000	0.172662
1	46310001	46410000	0.172662
1	46320001	46420000	0.172662
1	46330001	46430000	0.148126
1	46340001	46440000	0.148126
1	46350001	46450000	0.207267
1	46360001	46460000	0.148126
1	46370001	46470000	0.183819
1	46380001	46480000	0.176136
1	46390001	46490000	0.176136
1	46400001	46500000	0.176136
1	46410001	46510000	0.176136
1	46420001	46520000	0.176136
1	46430001	46530000	0.176136
1	46440001	46540000	0.176136
1	46450001	46550000	0.176136
1	46460001	46560000	0.202876
1	46520001	46620000	0.165318
1	46530001	46630000	0.165318
1	46540001	46640000	0.165318
1	46550001	46650000	0.165318
1	46560001	46660000	0.165318
1	46570001	46670000	0.165318
1	46580001	46680000	0.165318
1	46590001	46690000	0.165318
1	46600001	46700000	0.165318
1	46610001	46710000	0.205927
1	46790001	46890000	0.177649
1	46800001	46900000	0.177649
1	46810001	46910000	0.177649
1	46820001	46920000	0.177649
1	46830001	46930000	0.177649
1	46840001	46940000	0.177649
1	46850001	46950000	0.177649
1	46860001	46960000	0.177649
1	46870001	46970000	0.239631
1	46880001	46980000	0.239631
1	47330001	47430000	0.174541
1	47340001	47440000	0.174541
1	47350001	47450000	0.174541
1	47360001	47460000	0.174541
1	47370001	47470000	0.174541
1	47380001	47480000	0.174541
1	47390001	47490000	0.174541
1	47400001	47500000	0.174541
1	47410001	47510000	0.174541
1	47420001	47520000	0.239631
1	47600001	47700000	0.239631
1	47610001	47710000	0.239631
1	47620001	47720000	0.205927
1	47630001	47730000	0.205927
1	47640001	47740000	0.205927
1	47650001	47750000	0.205927
1	47660001	47760000	0.205927
1	47670001	47770000	0.205927
1	47680001	47780000	0.205927
1	47690001	47790000	0.206436
1	47700001	47800000	0.195862
1	47710001	47810000	0.208216
1	47720001	47820000	0.218582
1	47730001	47830000	0.218582
1	47740001	47840000	0.196429
1	47750001	47850000	0.196429
1	47760001	47860000	0.196429
1	47770001	47870000	0.196429
1	47780001	47880000	0.196429
1	47790001	47890000	0.193319
1	47800001	47900000	0.187708
1	47810001	47910000	0.148126
1	47820001	47920000	0.148126
1	47830001	47930000	0.148126
1	47950001	48050000	0.156832
1	47960001	48060000	0.156832
1	47970001	48070000	0.156832
1	47980001	48080000	0.156832
1	47990001	48090000	0.193853
1	48000001	48100000	0.193853
1	48010001	48110000	0.193853
1	48020001	48120000	0.224035
1	48030001	48130000	0.224035
1	48040001	48140000	0.224035
1	48050001	48150000	0.200908
1	48060001	48160000	0.183426
1	48070001	48170000	0.183426
1	48080001	48180000	0.183426
1	48150001	48250000	0.17957
1	48160001	48260000	0.207267
1	48170001	48270000	0.207267
1	48180001	48280000	0.207267
1	48190001	48290000	0.207267
1	48200001	48300000	0.207267
1	48210001	48310000	0.207267
1	48220001	48320000	0.207267
1	48230001	48330000	0.207267
1	48240001	48340000	0.207267
1	48250001	48350000	0.207267
1	48260001	48360000	0.207267
1	48270001	48370000	0.207267
1	48280001	48380000	0.207267
1	48290001	48390000	0.207267
1	48300001	48400000	0.207267
1	48310001	48410000	0.148126
1	48320001	48420000	0.148126
1	48330001	48430000	0.148126
1	48540001	48640000	0.177649
1	48550001	48650000	0.177649
1	48560001	48660000	0.177649
1	48570001	48670000	0.177649
1	48580001	48680000	0.177649
1	48850001	48950000	0.164792
1	48860001	48960000	0.164792
1	48870001	48970000	0.164792
1	48880001	48980000	0.164792
1	48890001	48990000	0.164792
1	48900001	49000000	0.164792
1	48910001	49010000	0.164792
1	48920001	49020000	0.164792
1	49020001	49120000	0.224976
1	49030001	49130000	0.28683
1	49040001	49140000	0.256737
1	49050001	49150000	0.256737
1	49060001	49160000	0.299255
1	49070001	49170000	0.299255
1	49080001	49180000	0.256737
1	49090001	49190000	0.256737
1	49100001	49200000	0.237903
1	49110001	49210000	0.237903
1	49120001	49220000	0.209753
1	49130001	49230000	0.209753
1	49140001	49240000	0.213415
1	49150001	49250000	0.213415
1	49160001	49260000	0.213415
1	49170001	49270000	0.213415
1	49180001	49280000	0.257269
1	49190001	49290000	0.257269
1	49200001	49300000	0.238957
1	49210001	49310000	0.238957
1	49240001	49340000	0.219166
1	49250001	49350000	0.219166
1	49260001	49360000	0.219166
1	49270001	49370000	0.247035
1	49280001	49380000	0.247035
1	49290001	49390000	0.247035
1	49300001	49400000	0.271617
1	49310001	49410000	0.271617
1	49320001	49420000	0.271617
1	49330001	49430000	0.304029
1	49340001	49440000	0.240173
1	49350001	49450000	0.240173
1	49360001	49460000	0.240173
1	49420001	49520000	0.240173
1	49430001	49530000	0.240173
1	49440001	49540000	0.285714
1	49450001	49550000	0.285714
1	49460001	49560000	0.285714
1	49470001	49570000	0.285714
1	49480001	49580000	0.257609
1	49490001	49590000	0.257609
1	49500001	49600000	0.257609
1	49510001	49610000	0.257609
1	49520001	49620000	0.157038
1	49530001	49630000	0.157038
1	49540001	49640000	0.157038
1	49570001	49670000	0.157038
1	49670001	49770000	0.243576
1	49680001	49780000	0.352159
1	49690001	49790000	0.352159
1	49700001	49800000	0.276711
1	49710001	49810000	0.276711
1	49720001	49820000	0.276711
1	49730001	49830000	0.238602
1	49740001	49840000	0.238602
1	49750001	49850000	0.211022
1	49760001	49860000	0.211022
1	49770001	49870000	0.191628
1	49780001	49880000	0.191628
1	49790001	49890000	0.191628
1	49800001	49900000	0.191628
1	49810001	49910000	0.191628
1	49820001	49920000	0.191628
1	49830001	49930000	0.210273
1	49840001	49940000	0.210273
1	49850001	49950000	0.247523
1	49860001	49960000	0.247523
1	55360001	55460000	0.169643
1	55370001	55470000	0.169643
1	55380001	55480000	0.169643
1	55390001	55490000	0.169643
1	55400001	55500000	0.169643
1	55630001	55730000	0.148483
1	55640001	55740000	0.148483
1	55660001	55760000	0.156219
1	55670001	55770000	0.156219
1	55680001	55780000	0.156219
1	55690001	55790000	0.156219
1	55700001	55800000	0.156219
1	55710001	55810000	0.148352
1	55720001	55820000	0.148352
1	55760001	55860000	0.202128
1	55770001	55870000	0.202128
1	55780001	55880000	0.202128
1	55790001	55890000	0.202128
1	56300001	56400000	0.164093
1	56310001	56410000	0.151376
1	56320001	56420000	0.151376
1	82280001	82380000	0.176339
1	82290001	82390000	0.176339
1	82300001	82400000	0.176339
1	82310001	82410000	0.176339
1	82590001	82690000	0.21346
1	82600001	82700000	0.175147
1	82610001	82710000	0.175147
1	82620001	82720000	0.175147
1	82630001	82730000	0.175147
1	82640001	82740000	0.175147
1	82650001	82750000	0.163247
1	82760001	82860000	0.175147
1	82770001	82870000	0.21346
1	82780001	82880000	0.21346
1	82790001	82890000	0.21346
1	82800001	82900000	0.175147
1	82810001	82910000	0.175147
1	82820001	82920000	0.175147
1	82830001	82930000	0.163247
1	82840001	82940000	0.163247
1	82850001	82950000	0.163247
1	82930001	83030000	0.175147
1	82940001	83040000	0.163247
1	82950001	83050000	0.163247
1	82960001	83060000	0.163247
1	82970001	83070000	0.175147
1	82980001	83080000	0.175147
1	82990001	83090000	0.175147
1	83000001	83100000	0.175147
1	83010001	83110000	0.175147
1	83020001	83120000	0.175147
1	88050001	88150000	0.154135
1	88060001	88160000	0.176339
1	88070001	88170000	0.176339
1	88080001	88180000	0.15331
1	88090001	88190000	0.15331
1	88100001	88200000	0.15331
1	88110001	88210000	0.15331
1	88120001	88220000	0.15331
1	88130001	88230000	0.15331
1	88140001	88240000	0.15331
1	105610001	105710000	0.210084
1	105620001	105720000	0.210084
1	105630001	105730000	0.210084
1	105640001	105740000	0.210084
1	105650001	105750000	0.210084
1	105660001	105760000	0.210084
1	105670001	105770000	0.210084
1	105680001	105780000	0.210084
1	105690001	105790000	0.210084
1	105700001	105800000	0.210084
1	105710001	105810000	0.210084
1	105720001	105820000	0.210084
1	106520001	106620000	0.218559
1	106530001	106630000	0.264456
1	106540001	106640000	0.264456
1	106550001	106650000	0.264456
1	106560001	106660000	0.264456
1	106570001	106670000	0.264456
1	106580001	106680000	0.264456
1	106590001	106690000	0.264456
1	106600001	106700000	0.264456
1	106610001	106710000	0.264456
1	106920001	107020000	0.173469
1	106930001	107030000	0.173469
1	106940001	107040000	0.173469
1	106950001	107050000	0.357143
1	106960001	107060000	0.269133
1	106970001	107070000	0.269133
1	106980001	107080000	0.315217
1	106990001	107090000	0.325843
1	107000001	107100000	0.325843
1	107010001	107110000	0.325843
1	107020001	107120000	0.284367
1	107030001	107130000	0.284367
1	107040001	107140000	0.284367
1	107050001	107150000	0.284367
1	107060001	107160000	0.386905
1	107070001	107170000	0.386905
1	107130001	107230000	0.352792
1	107140001	107240000	0.352792
1	107150001	107250000	0.352792
1	107160001	107260000	0.352792
1	107170001	107270000	0.352792
1	107180001	107280000	0.352792
1	107190001	107290000	0.352792
1	107200001	107300000	0.352792
1	107210001	107310000	0.352792
1	107220001	107320000	0.352792
1	107230001	107330000	0.352792
1	107240001	107340000	0.352792
1	107250001	107350000	0.149983
1	107260001	107360000	0.149983
1	107270001	107370000	0.149983
1	107280001	107380000	0.155018
1	107350001	107450000	0.270016
1	107360001	107460000	0.270016
1	107370001	107470000	0.255952
1	107380001	107480000	0.291126
1	107390001	107490000	0.291126
1	107400001	107500000	0.291126
1	107410001	107510000	0.291126
1	107420001	107520000	0.321881
1	107430001	107530000	0.321881
1	107440001	107540000	0.321881
1	107450001	107550000	0.332167
1	107460001	107560000	0.332167
1	107470001	107570000	0.340802
1	107480001	107580000	0.238125
1	107490001	107590000	0.215438
1	107500001	107600000	0.215438
1	107510001	107610000	0.215438
1	107520001	107620000	0.151469
1	107530001	107630000	0.151469
1	107540001	107640000	0.151469
1	107690001	107790000	0.170429
1	107700001	107800000	0.170429
1	107710001	107810000	0.221374
1	107720001	107820000	0.221374
1	107730001	107830000	0.247405
1	107740001	107840000	0.247405
1	107750001	107850000	0.247405
1	107760001	107860000	0.247405
1	107770001	107870000	0.32783
1	107780001	107880000	0.32783
1	107790001	107890000	0.32783
1	107800001	107900000	0.32783
1	107810001	107910000	0.32783
1	107820001	107920000	0.257687
1	107830001	107930000	0.194139
1	107840001	107940000	0.194139
1	107850001	107950000	0.174059
1	107860001	107960000	0.174059
1	107990001	108090000	0.166489
1	108000001	108100000	0.166489
1	108010001	108110000	0.166489
1	108020001	108120000	0.148634
1	108030001	108130000	0.148634
1	108040001	108140000	0.214801
1	108050001	108150000	0.214801
1	108060001	108160000	0.229911
1	108070001	108170000	0.229911
1	108080001	108180000	0.229911
1	108310001	108410000	0.202128
1	108320001	108420000	0.202128
1	108330001	108430000	0.202128
1	108340001	108440000	0.202128
1	108350001	108450000	0.202128
1	108360001	108460000	0.202128
1	108370001	108470000	0.202128
1	108380001	108480000	0.202128
1	108390001	108490000	0.202128
1	108400001	108500000	0.202128
1	108490001	108590000	0.149295
1	108500001	108600000	0.149295
1	108510001	108610000	0.149295
1	108520001	108620000	0.149295
1	108530001	108630000	0.149295
1	108540001	108640000	0.149295
1	108550001	108650000	0.149295
1	110000001	110100000	0.217575
1	110010001	110110000	0.217575
1	110020001	110120000	0.217575
1	110030001	110130000	0.217575
1	110040001	110140000	0.217575
1	110050001	110150000	0.217575
1	110060001	110160000	0.164526
1	110070001	110170000	0.184435
1	110080001	110180000	0.164526
1	110090001	110190000	0.164526
1	110380001	110480000	0.152381
1	110390001	110490000	0.152381
1	110400001	110500000	0.152381
1	110410001	110510000	0.152381
1	110420001	110520000	0.152381
1	110430001	110530000	0.152381
1	110440001	110540000	0.152381
1	110450001	110550000	0.152381
1	110460001	110560000	0.152381
1	110470001	110570000	0.152381
1	110480001	110580000	0.152381
1	111360001	111460000	0.165934
1	111370001	111470000	0.165934
1	111380001	111480000	0.165934
1	111390001	111490000	0.165934
1	111400001	111500000	0.194529
1	111410001	111510000	0.242857
1	111420001	111520000	0.242857
1	111430001	111530000	0.242857
1	111440001	111540000	0.242857
1	111450001	111550000	0.242857
1	111460001	111560000	0.242857
1	111470001	111570000	0.242857
1	111480001	111580000	0.242857
1	111490001	111590000	0.242857
1	111500001	111600000	0.242857
1	111510001	111610000	0.242857
1	111520001	111620000	0.242857
1	111530001	111630000	0.219048
1	111540001	111640000	0.219048
1	111550001	111650000	0.219048
1	111560001	111660000	0.195238
1	111570001	111670000	0.195238
1	111580001	111680000	0.195238
1	111590001	111690000	0.195238
1	111600001	111700000	0.195238
1	111610001	111710000	0.195238
1	111620001	111720000	0.195238
1	112030001	112130000	0.189342
1	112040001	112140000	0.178046
1	112050001	112150000	0.168297
1	112060001	112160000	0.168297
1	112070001	112170000	0.168297
1	112080001	112180000	0.168297
1	112090001	112190000	0.168297
1	112100001	112200000	0.168297
1	112110001	112210000	0.152324
1	112150001	112250000	0.152542
1	112160001	112260000	0.152542
1	112170001	112270000	0.152542
1	112180001	112280000	0.152542
1	112190001	112290000	0.152542
1	112730001	112830000	0.178571
1	112740001	112840000	0.178571
1	113140001	113240000	0.149295
1	113150001	113250000	0.149295
1	113160001	113260000	0.149295
1	113170001	113270000	0.149295
1	115720001	115820000	0.153893
1	115730001	115830000	0.153893
1	115740001	115840000	0.153893
1	115750001	115850000	0.153893
1	115760001	115860000	0.153893
1	115770001	115870000	0.153893
1	115780001	115880000	0.153893
1	115790001	115890000	0.153893
1	115800001	115900000	0.153893
1	115810001	115910000	0.153893
1	115820001	115920000	0.153893
1	115830001	115930000	0.153893
1	117850001	117950000	0.176339
1	117860001	117960000	0.176339
1	117870001	117970000	0.176339
1	117880001	117980000	0.176339
1	117890001	117990000	0.176339
1	117900001	118000000	0.176339
1	117910001	118010000	0.176339
1	117920001	118020000	0.176339
1	117930001	118030000	0.176339
1	118000001	118100000	0.218487
1	118010001	118110000	0.218487
1	118020001	118120000	0.218487
1	118030001	118130000	0.218487
1	118040001	118140000	0.218487
1	118050001	118150000	0.218487
1	118060001	118160000	0.218487
1	118070001	118170000	0.218487
1	118080001	118180000	0.218487
1	118090001	118190000	0.218487
1	119000001	119100000	0.158596
1	120860001	120960000	0.186426
1	120870001	120970000	0.186426
1	120880001	120980000	0.186426
1	120890001	120990000	0.186426
1	121170001	121270000	0.204082
1	121180001	121280000	0.204082
1	121190001	121290000	0.204082
1	121200001	121300000	0.204082
1	121210001	121310000	0.204082
1	121220001	121320000	0.204082
1	121230001	121330000	0.204082
1	121240001	121340000	0.204082
1	121250001	121350000	0.204082
1	139120001	139220000	0.241071
1	139130001	139230000	0.241071
1	139140001	139240000	0.241071
1	139150001	139250000	0.241071
1	139160001	139260000	0.241071
1	139170001	139270000	0.241071
1	139180001	139280000	0.241071
1	139190001	139290000	0.241071
1	140730001	140830000	0.14723
1	140740001	140840000	0.14723
1	142360001	142460000	0.156355
1	143270001	143370000	0.202128
1	143280001	143380000	0.202128
1	143290001	143390000	0.202128
1	143300001	143400000	0.202128
1	143310001	143410000	0.202128
1	143320001	143420000	0.202128
1	143330001	143430000	0.202128
1	143340001	143440000	0.202128
1	143350001	143450000	0.202128
1	143360001	143460000	0.202128
1	144850001	144950000	0.176339
1	144860001	144960000	0.176339
1	144870001	144970000	0.176339
1	144880001	144980000	0.176339
1	144890001	144990000	0.176339
1	144900001	145000000	0.176339
1	144910001	145010000	0.176339
1	144920001	145020000	0.176339
1	144930001	145030000	0.176339
1	144940001	145040000	0.176339
1	145030001	145130000	0.176339
1	145040001	145140000	0.176339
1	145050001	145150000	0.176339
1	145060001	145160000	0.176339
1	145070001	145170000	0.176339
1	145080001	145180000	0.176339
1	145090001	145190000	0.176339
1	145100001	145200000	0.176339
1	145110001	145210000	0.176339
1	145120001	145220000	0.176339
1	145130001	145230000	0.176339
1	145140001	145240000	0.176339
1	145180001	145280000	0.202128
1	145190001	145290000	0.202128
1	145200001	145300000	0.202128
1	145210001	145310000	0.202128
1	145220001	145320000	0.202128
1	145230001	145330000	0.202128
1	145240001	145340000	0.202128
1	145250001	145350000	0.202128
1	145260001	145360000	0.202128
1	145270001	145370000	0.202128
1	145280001	145380000	0.202128
1	145290001	145390000	0.202128
1	145300001	145400000	0.202128
1	145310001	145410000	0.202128
1	145320001	145420000	0.202128
1	145340001	145440000	0.202128
1	145350001	145450000	0.202128
1	145360001	145460000	0.15066
1	145370001	145470000	0.158607
1	145380001	145480000	0.158607
1	145390001	145490000	0.158607
1	145400001	145500000	0.158607
1	145410001	145510000	0.158607
1	145420001	145520000	0.158607
1	145430001	145530000	0.158607
1	145460001	145560000	0.176339
1	145470001	145570000	0.278536
1	145480001	145580000	0.278536
1	145490001	145590000	0.278536
1	145500001	145600000	0.278536
1	145510001	145610000	0.278536
1	145520001	145620000	0.278536
1	145530001	145630000	0.278536
1	145540001	145640000	0.278536
1	145550001	145650000	0.278536
1	145560001	145660000	0.278536
1	145780001	145880000	0.239631
1	145790001	145890000	0.239631
1	145800001	145900000	0.239631
1	145810001	145910000	0.239631
1	145820001	145920000	0.239631
1	145830001	145930000	0.239631
1	145840001	145940000	0.239631
1	145850001	145950000	0.239631
1	145860001	145960000	0.239631
1	145870001	145970000	0.239631
1	145880001	145980000	0.239631
1	145890001	145990000	0.239631
1	145900001	146000000	0.239631
1	145910001	146010000	0.239631
1	147420001	147520000	0.14723
1	147430001	147530000	0.14723
1	147440001	147540000	0.14723
1	147870001	147970000	0.215292
1	147880001	147980000	0.181185
1	147890001	147990000	0.215292
1	147900001	148000000	0.215292
1	147910001	148010000	0.215292
1	147920001	148020000	0.215292
1	147930001	148030000	0.215292
1	147940001	148040000	0.215292
1	147950001	148050000	0.215292
1	147960001	148060000	0.215292
1	148680001	148780000	0.171975
1	148690001	148790000	0.171512
1	148700001	148800000	0.171512
1	148710001	148810000	0.171512
1	148720001	148820000	0.170507
1	148730001	148830000	0.170507
1	148740001	148840000	0.170507
1	148750001	148850000	0.172871
1	148760001	148860000	0.178571
1	148770001	148870000	0.178571
1	148780001	148880000	0.178571
1	148790001	148890000	0.178571
1	148800001	148900000	0.178571
1	148810001	148910000	0.178571
1	148820001	148920000	0.178571
1	148830001	148930000	0.178571
1	148840001	148940000	0.178571
1	148880001	148980000	0.178571
1	148890001	148990000	0.178571
1	148900001	149000000	0.178571
1	148910001	149010000	0.178571
1	148920001	149020000	0.178571
1	148930001	149030000	0.178571
1	148940001	149040000	0.178571
1	148950001	149050000	0.178571
1	148960001	149060000	0.178571
1	148970001	149070000	0.178571
1	148980001	149080000	0.178571
1	148990001	149090000	0.178571
1	153710001	153810000	0.173228
1	153720001	153820000	0.173228
1	153730001	153830000	0.173228
1	153740001	153840000	0.173228
1	153750001	153850000	0.173228
1	153760001	153860000	0.173228
1	153770001	153870000	0.173228
1	153780001	153880000	0.173228
1	153790001	153890000	0.173228
1	153800001	153900000	0.173228
1	153850001	153950000	0.173228
1	153860001	153960000	0.173228
1	153870001	153970000	0.173228
1	153880001	153980000	0.173228
1	153890001	153990000	0.173228
1	153900001	154000000	0.173228
1	153910001	154010000	0.173228
1	153920001	154020000	0.173228
1	153930001	154030000	0.173228
1	153940001	154040000	0.173228
1	153980001	154080000	0.173228
1	153990001	154090000	0.173228
1	154000001	154100000	0.173228
1	154010001	154110000	0.173228
1	154020001	154120000	0.173228
1	154030001	154130000	0.173228
1	154040001	154140000	0.173228
1	154050001	154150000	0.173228
1	154060001	154160000	0.173228
1	154070001	154170000	0.173228
1	154090001	154190000	0.209726
1	154100001	154200000	0.209726
1	154110001	154210000	0.209726
1	154120001	154220000	0.209726
1	154130001	154230000	0.209726
1	154140001	154240000	0.209726
1	154150001	154250000	0.209726
1	154160001	154260000	0.209726
1	154170001	154270000	0.209726
1	154180001	154280000	0.209726
1	154190001	154290000	0.209726
1	154200001	154300000	0.209726
1	154210001	154310000	0.209726
1	154220001	154320000	0.209726
1	154230001	154330000	0.209726
1	155180001	155280000	0.178571
1	155190001	155290000	0.178571
1	155200001	155300000	0.178571
1	155210001	155310000	0.178571
1	155220001	155320000	0.178571
1	155230001	155330000	0.178571
1	155240001	155340000	0.178571
1	155250001	155350000	0.178571
1	155260001	155360000	0.178571
1	155270001	155370000	0.178571
1	155280001	155380000	0.178571
1	155290001	155390000	0.178571
1	155300001	155400000	0.178571
1	155310001	155410000	0.178571
1	155320001	155420000	0.178571
1	155330001	155430000	0.178571
1	155340001	155440000	0.178571
1	155350001	155450000	0.178571
1	155360001	155460000	0.178571
1	155370001	155470000	0.178571
1	155380001	155480000	0.178571
1	155390001	155490000	0.178571
1	155400001	155500000	0.178571
1	155410001	155510000	0.178571
1	155680001	155780000	0.178571
1	155690001	155790000	0.178571
1	155700001	155800000	0.178571
1	155710001	155810000	0.178571
1	155720001	155820000	0.178571
1	155730001	155830000	0.178571
1	155740001	155840000	0.178571
1	155750001	155850000	0.178571
1	155760001	155860000	0.178571
1	155770001	155870000	0.178571
1	155780001	155880000	0.178571
1	155790001	155890000	0.178571
1	155800001	155900000	0.178571
1	155810001	155910000	0.156648
1	155820001	155920000	0.156648
1	155830001	155930000	0.156648
1	155840001	155940000	0.150364
1	248990001	249090000	0.158596
1	249000001	249100000	0.158596
1	249010001	249110000	0.158596
1	249020001	249120000	0.158596
1	249030001	249130000	0.158596
1	249040001	249140000	0.158596
1	252820001	252920000	0.181185
1	252830001	252930000	0.181185
1	252840001	252940000	0.181185
1	252850001	252950000	0.181185
1	252860001	252960000	0.181185
1	252900001	253000000	0.204424
1	252910001	253010000	0.204424
1	252920001	253020000	0.204424
1	252930001	253030000	0.204424
1	252940001	253040000	0.204424
1	257330001	257430000	0.147619
1	257340001	257440000	0.147619
1	257350001	257450000	0.147619
1	257360001	257460000	0.147619
1	257370001	257470000	0.147619
1	257380001	257480000	0.147619
1	257390001	257490000	0.147619
1	257400001	257500000	0.147619
1	257410001	257510000	0.147619
1	257420001	257520000	0.147619
1	257820001	257920000	0.168118
1	257830001	257930000	0.168118
1	257840001	257940000	0.168118
1	257850001	257950000	0.168118
1	257860001	257960000	0.168118
1	257870001	257970000	0.168118
1	257880001	257980000	0.168118
1	257890001	257990000	0.168118
1	257900001	258000000	0.168118
1	257910001	258010000	0.168118
1	269000001	269100000	0.150606
1	269010001	269110000	0.230046
1	269020001	269120000	0.230046
1	269030001	269130000	0.230046
1	269040001	269140000	0.269263
1	269050001	269150000	0.273927
1	269060001	269160000	0.278473
1	269070001	269170000	0.278473
1	269080001	269180000	0.278473
1	269090001	269190000	0.271943
1	269100001	269200000	0.276669
1	269110001	269210000	0.276669
1	269120001	269220000	0.269263
1	269130001	269230000	0.269263
1	269140001	269240000	0.265444
1	269150001	269250000	0.259562
1	269160001	269260000	0.227079
1	269170001	269270000	0.227079
1	269180001	269280000	0.227079
1	269190001	269290000	0.227079
1	269200001	269300000	0.227079
1	269210001	269310000	0.227079
1	269610001	269710000	0.149089
1	269620001	269720000	0.265594
1	269630001	269730000	0.265594
1	269640001	269740000	0.265594
1	269650001	269750000	0.265594
1	269660001	269760000	0.265594
1	269670001	269770000	0.265594
1	269680001	269780000	0.265594
1	269690001	269790000	0.265594
1	269700001	269800000	0.265594
1	269720001	269820000	0.265594
1	269730001	269830000	0.265594
1	269740001	269840000	0.265594
1	269750001	269850000	0.265594
1	269760001	269860000	0.265594
1	269770001	269870000	0.265594
1	269780001	269880000	0.265594
1	269790001	269890000	0.265594
1	269800001	269900000	0.265594
1	269810001	269910000	0.265594
1	269820001	269920000	0.265594
1	269830001	269930000	0.265594
1	269840001	269940000	0.265594
1	269850001	269950000	0.265594
1	269860001	269960000	0.265594
1	269870001	269970000	0.265594
1	269880001	269980000	0.265594
1	269890001	269990000	0.265594
1	270330001	270430000	0.193307
1	270340001	270440000	0.193307
1	270350001	270450000	0.193307
1	270360001	270460000	0.157541
1	270370001	270470000	0.157541
1	270380001	270480000	0.157541
1	270390001	270490000	0.157541
1	270700001	270800000	0.151603
1	270710001	270810000	0.151603
1	270720001	270820000	0.151603
1	270730001	270830000	0.151603
1	270780001	270880000	0.220779
1	270790001	270890000	0.220779
1	270930001	271030000	0.1774
1	270940001	271040000	0.1774
1	270950001	271050000	0.1774
1	270960001	271060000	0.1774
1	270970001	271070000	0.227079
1	270980001	271080000	0.227079
1	270990001	271090000	0.227079
1	271000001	271100000	0.227079
1	271010001	271110000	0.227079
1	271490001	271590000	0.152542
1	271500001	271600000	0.152542
1	271810001	271910000	0.254121
1	271820001	271920000	0.254121
1	271830001	271930000	0.254121
1	271840001	271940000	0.254121
1	271850001	271950000	0.254121
1	271860001	271960000	0.254121
1	271870001	271970000	0.20084
1	271880001	271980000	0.20084
1	272290001	272390000	0.188393
1	272300001	272400000	0.188393
1	272310001	272410000	0.295238
1	272320001	272420000	0.295238
1	272330001	272430000	0.295238
1	272340001	272440000	0.295238
1	272350001	272450000	0.295238
1	272360001	272460000	0.295238
1	272370001	272470000	0.295238
1	272790001	272890000	0.254121
1	272800001	272900000	0.254121
1	272810001	272910000	0.254121
1	272820001	272920000	0.254121
1	272830001	272930000	0.254121
1	272840001	272940000	0.254121
1	272850001	272950000	0.254121
1	272860001	272960000	0.254121
1	272870001	272970000	0.254121
1	272880001	272980000	0.254121
1	273860001	273960000	0.152542
1	273870001	273970000	0.152542
1	273880001	273980000	0.152542
1	273890001	273990000	0.171906
1	273900001	274000000	0.171906
1	273910001	274010000	0.210864
1	273920001	274020000	0.210864
1	273930001	274030000	0.234009
1	273940001	274040000	0.234009
1	273950001	274050000	0.234009
1	273960001	274060000	0.253787
1	273970001	274070000	0.253787
1	273980001	274080000	0.253787
1	273990001	274090000	0.29374
1	274000001	274100000	0.29374
1	274270001	274370000	0.203939
1	274280001	274380000	0.203939
1	274290001	274390000	0.203939
1	274300001	274400000	0.203939
1	274320001	274420000	0.154229
1	274330001	274430000	0.154229
1	274340001	274440000	0.154229
1	274350001	274450000	0.265412
1	274360001	274460000	0.265412
1	274370001	274470000	0.279303
1	274380001	274480000	0.279303
1	274390001	274490000	0.279303
1	274400001	274500000	0.279303
1	274410001	274510000	0.306723
1	274420001	274520000	0.335215
1	274430001	274530000	0.335215
1	274440001	274540000	0.335215
1	274450001	274550000	0.203939
1	274460001	274560000	0.203939
1	274470001	274570000	0.203939
1	274480001	274580000	0.203939
1	274490001	274590000	0.203939
1	274500001	274600000	0.14862
1	274570001	274670000	0.26311
1	274580001	274680000	0.26311
1	274590001	274690000	0.26311
1	274600001	274700000	0.385561
1	274610001	274710000	0.385561
1	274620001	274720000	0.385561
1	274630001	274730000	0.385561
1	274640001	274740000	0.385561
1	274650001	274750000	0.385561
1	274660001	274760000	0.32
1	274670001	274770000	0.281165
1	274680001	274780000	0.281165
1	274690001	274790000	0.281165
1	274700001	274800000	0.281165
1	274720001	274820000	0.156116
1	274900001	275000000	0.190368
1	274910001	275010000	0.190368
1	274920001	275020000	0.190368
1	274930001	275030000	0.190368
1	274940001	275040000	0.190368
1	274950001	275050000	0.190368
1	274960001	275060000	0.190368
1	274970001	275070000	0.190368
1	274980001	275080000	0.190368
1	274990001	275090000	0.29374
1	275760001	275860000	0.179422
1	275770001	275870000	0.34127
1	275780001	275880000	0.34127
1	275790001	275890000	0.34127
1	275800001	275900000	0.219322
1	275810001	275910000	0.219322
1	275820001	275920000	0.169884
1	275830001	275930000	0.169884
1	276750001	276850000	0.177534
1	276760001	276860000	0.177534
1	276870001	276970000	0.147619
1	276880001	276980000	0.147619
1	276990001	277090000	0.147619
1	277000001	277100000	0.147619
1	277010001	277110000	0.202504
1	277020001	277120000	0.202504
1	277030001	277130000	0.25
1	277040001	277140000	0.25
1	277050001	277150000	0.25
1	277060001	277160000	0.202504
1	277070001	277170000	0.202504
1	277080001	277180000	0.202504
1	277090001	277190000	0.202504
1	277100001	277200000	0.185111
1	277110001	277210000	0.147619
1	277120001	277220000	0.147619
1	277130001	277230000	0.147619
1	277140001	277240000	0.147619
1	277150001	277250000	0.147619
1	277160001	277260000	0.147619
1	277170001	277270000	0.147619
1	277180001	277280000	0.147619
1	277190001	277290000	0.147619
1	277200001	277300000	0.147619
1	277210001	277310000	0.147619
1	277220001	277320000	0.147619
1	277480001	277580000	0.219178
1	277490001	277590000	0.219178
1	277500001	277600000	0.219178
1	277510001	277610000	0.255952
1	277520001	277620000	0.255952
1	277530001	277630000	0.255952
1	277540001	277640000	0.255952
1	277550001	277650000	0.255952
1	277560001	277660000	0.255952
1	277570001	277670000	0.255952
1	277840001	277940000	0.203494
1	277850001	277950000	0.203494
1	277860001	277960000	0.203494
1	277870001	277970000	0.203494
1	277880001	277980000	0.222503
1	277890001	277990000	0.222503
1	277900001	278000000	0.254386
1	277910001	278010000	0.254386
1	277920001	278020000	0.254386
1	277930001	278030000	0.254386
1	277940001	278040000	0.252874
1	277950001	278050000	0.190409
1	277960001	278060000	0.190409
1	277970001	278070000	0.190409
1	278340001	278440000	0.172592
1	278350001	278450000	0.172592
1	278360001	278460000	0.22117
1	278370001	278470000	0.22117
1	278380001	278480000	0.33281
1	278390001	278490000	0.33281
1	278400001	278500000	0.33281
1	278410001	278510000	0.33281
1	278420001	278520000	0.33281
1	278430001	278530000	0.254527
1	278860001	278960000	0.148114
1	278870001	278970000	0.148114
1	279320001	279420000	0.202776
1	279330001	279430000	0.202776
1	279340001	279440000	0.202776
1	279350001	279450000	0.202776
1	279360001	279460000	0.202776
1	279370001	279470000	0.202776
1	279380001	279480000	0.257921
1	279390001	279490000	0.257921
1	279400001	279500000	0.257921
1	280060001	280160000	0.153325
1	280500001	280600000	0.179132
1	280510001	280610000	0.179132
1	280520001	280620000	0.179132
1	280530001	280630000	0.315138
1	280540001	280640000	0.315138
1	280550001	280650000	0.27611
1	280560001	280660000	0.27611
1	280570001	280670000	0.308888
1	280580001	280680000	0.308888
1	280590001	280690000	0.219577
1	280600001	280700000	0.219577
1	280610001	280710000	0.219577
1	280620001	280720000	0.219577
1	280630001	280730000	0.18106
1	281370001	281470000	0.176636
1	281380001	281480000	0.176636
1	281390001	281490000	0.176636
1	281400001	281500000	0.176636
1	281410001	281510000	0.176636
1	281420001	281520000	0.176636
1	281600001	281700000	0.151429
1	281610001	281710000	0.239631
1	281620001	281720000	0.239631
1	281630001	281730000	0.239631
1	281640001	281740000	0.239631
1	281650001	281750000	0.239631
1	281660001	281760000	0.239631
1	281670001	281770000	0.239631
1	281680001	281780000	0.242525
1	281690001	281790000	0.242525
1	289220001	289320000	0.14903
1	289230001	289330000	0.14903
1	290050001	290150000	0.15628
1	290920001	291020000	0.152024
1	290950001	291050000	0.15625
1	298050001	298150000	0.174413
1	298060001	298160000	0.149254
1	298070001	298170000	0.149254
1	298080001	298180000	0.174413
1	298090001	298190000	0.174413
1	298100001	298200000	0.174413
1	298110001	298210000	0.174413
1	298120001	298220000	0.174413
1	298130001	298230000	0.174413
1	299910001	300010000	0.245392
1	299920001	300020000	0.245392
1	299930001	300030000	0.245392
1	299940001	300040000	0.226509
1	299950001	300050000	0.231211
1	299960001	300060000	0.231211
1	299970001	300070000	0.231211
1	299980001	300080000	0.231211
1	299990001	300090000	0.231211
1	300000001	300100000	0.231211
1	300010001	300110000	0.226509
1	300020001	300120000	0.154135
1	300030001	300130000	0.154135
1	300140001	300240000	0.166667
1	300150001	300250000	0.166667
1	300220001	300320000	0.166667
1	300230001	300330000	0.166667
1	300240001	300340000	0.148671
1	300250001	300350000	0.148671
1	300260001	300360000	0.189463
1	300270001	300370000	0.189463
1	300280001	300380000	0.18956
1	300290001	300390000	0.214133
1	300300001	300400000	0.214133
1	300310001	300410000	0.214133
1	300320001	300420000	0.214133
1	300330001	300430000	0.214133
1	300340001	300440000	0.238602
1	300350001	300450000	0.216644
1	300360001	300460000	0.216644
1	300370001	300470000	0.216644
1	300380001	300480000	0.216644
1	300390001	300490000	0.189342
1	300400001	300500000	0.189342
1	300410001	300510000	0.189342
1	300470001	300570000	0.194058
1	300480001	300580000	0.155553
1	300520001	300620000	0.156848
1	300530001	300630000	0.156848
1	300540001	300640000	0.167552
1	300550001	300650000	0.152681
1	300560001	300660000	0.152681
1	309210001	309310000	0.205935
1	309220001	309320000	0.205935
1	309230001	309330000	0.205935
1	309240001	309340000	0.205935
1	309250001	309350000	0.149209
1	309260001	309360000	0.149209
1	309270001	309370000	0.149209
1	309280001	309380000	0.161491
1	309290001	309390000	0.179548
1	309300001	309400000	0.205031
1	309310001	309410000	0.16336
1	309320001	309420000	0.16336
1	309330001	309430000	0.16336
1	309340001	309440000	0.16336
1	309350001	309450000	0.223986
1	309360001	309460000	0.159664
1	309370001	309470000	0.159664
1	309380001	309480000	0.159664
1	309390001	309490000	0.191315
1	309400001	309500000	0.17319
1	309410001	309510000	0.17319
1	309420001	309520000	0.17319
1	309430001	309530000	0.223871
1	309440001	309540000	0.223871
1	309450001	309550000	0.223871
1	309460001	309560000	0.306478
1	309470001	309570000	0.306478
1	309480001	309580000	0.29269
1	309490001	309590000	0.232897
1	309500001	309600000	0.232897
1	309510001	309610000	0.219541
1	309520001	309620000	0.219541
1	309530001	309630000	0.191996
1	309540001	309640000	0.191996
1	309550001	309650000	0.179854
1	309560001	309660000	0.186457
1	309570001	309670000	0.186457
1	309580001	309680000	0.171407
1	309590001	309690000	0.178311
1	309600001	309700000	0.178311
1	309610001	309710000	0.179876
1	309620001	309720000	0.179876
1	309630001	309730000	0.179876
1	309640001	309740000	0.179876
1	309650001	309750000	0.22117
1	309910001	310010000	0.204762
1	309920001	310020000	0.204762
1	309930001	310030000	0.204762
1	309940001	310040000	0.204762
1	309950001	310050000	0.204762
1	309960001	310060000	0.204762
1	309970001	310070000	0.204762
1	309980001	310080000	0.204762
1	309990001	310090000	0.204762
1	310000001	310100000	0.204762
1	310160001	310260000	0.204762
1	310170001	310270000	0.204762
1	310180001	310280000	0.204762
1	310190001	310290000	0.204762
1	310200001	310300000	0.204762
1	310210001	310310000	0.204762
2	2170001	2270000	0.202128
2	2180001	2280000	0.202128
2	2190001	2290000	0.202128
2	2200001	2300000	0.202128
2	2210001	2310000	0.202128
2	2220001	2320000	0.202128
2	2230001	2330000	0.202128
2	2240001	2340000	0.202128
2	2250001	2350000	0.202128
2	2260001	2360000	0.202128
2	18220001	18320000	0.178571
2	27630001	27730000	0.203939
2	27640001	27740000	0.214072
2	27650001	27750000	0.214072
2	27660001	27760000	0.214072
2	27670001	27770000	0.214072
2	27680001	27780000	0.214072
2	27690001	27790000	0.16043
2	28090001	28190000	0.169643
2	28100001	28200000	0.169643
2	28110001	28210000	0.201013
2	28120001	28220000	0.208641
2	28130001	28230000	0.208641
2	28140001	28240000	0.149561
2	28250001	28350000	0.169813
2	28260001	28360000	0.169813
2	28270001	28370000	0.15185
2	28280001	28380000	0.15185
2	28290001	28390000	0.167933
2	28300001	28400000	0.167933
2	28310001	28410000	0.167933
2	28320001	28420000	0.167933
2	28330001	28430000	0.155534
2	28340001	28440000	0.189189
2	28350001	28450000	0.162665
2	28360001	28460000	0.162665
2	28370001	28470000	0.162665
2	28380001	28480000	0.168919
2	28430001	28530000	0.174748
2	28440001	28540000	0.174748
2	28450001	28550000	0.174748
2	28460001	28560000	0.174748
2	28470001	28570000	0.174748
2	28640001	28740000	0.15645
2	28650001	28750000	0.15645
2	31690001	31790000	0.171358
2	31700001	31800000	0.171358
2	31710001	31810000	0.171358
2	31720001	31820000	0.171358
2	31730001	31830000	0.171358
2	31740001	31840000	0.171358
2	31750001	31850000	0.171358
2	31760001	31860000	0.171358
2	31770001	31870000	0.171358
2	31780001	31880000	0.171358
2	31790001	31890000	0.171358
2	31800001	31900000	0.171358
2	31810001	31910000	0.171358
2	34900001	35000000	0.22117
2	34910001	35010000	0.22117
2	34920001	35020000	0.22117
2	34930001	35030000	0.22117
2	34940001	35040000	0.165282
2	34950001	35050000	0.165282
2	37770001	37870000	0.149295
2	37780001	37880000	0.149295
2	37790001	37890000	0.149295
2	38150001	38250000	0.149295
2	48080001	48180000	0.158321
2	48090001	48190000	0.176829
2	48100001	48200000	0.176829
2	48260001	48360000	0.176829
2	48270001	48370000	0.176829
2	48280001	48380000	0.176829
2	48290001	48390000	0.176829
2	48300001	48400000	0.176829
2	48310001	48410000	0.176829
2	48320001	48420000	0.176829
2	48330001	48430000	0.176829
2	48340001	48440000	0.176829
2	48350001	48450000	0.176829
2	48360001	48460000	0.176829
2	48660001	48760000	0.176829
2	48670001	48770000	0.176829
2	48680001	48780000	0.176829
2	48690001	48790000	0.176829
2	48700001	48800000	0.176829
2	48710001	48810000	0.148684
2	48720001	48820000	0.148684
2	48730001	48830000	0.148684
2	48740001	48840000	0.148684
2	48960001	49060000	0.216544
2	48970001	49070000	0.216544
2	48980001	49080000	0.216544
2	48990001	49090000	0.216544
2	49000001	49100000	0.216544
2	49010001	49110000	0.216544
2	49020001	49120000	0.216544
2	49030001	49130000	0.216544
2	49040001	49140000	0.216544
2	49050001	49150000	0.216544
2	49060001	49160000	0.216544
2	49070001	49170000	0.216544
2	49080001	49180000	0.216544
2	49090001	49190000	0.216544
2	49100001	49200000	0.216544
2	49110001	49210000	0.216544
2	49120001	49220000	0.203552
2	49130001	49230000	0.203552
2	49140001	49240000	0.203552
2	49150001	49250000	0.196965
2	49160001	49260000	0.196965
2	49170001	49270000	0.196965
2	49180001	49280000	0.196965
2	49190001	49290000	0.17437
2	49200001	49300000	0.17437
2	49210001	49310000	0.17437
2	49290001	49390000	0.216544
2	49300001	49400000	0.216544
2	49310001	49410000	0.216544
2	49320001	49420000	0.216544
2	49330001	49430000	0.216544
2	49710001	49810000	0.176829
2	49720001	49820000	0.176829
2	49730001	49830000	0.176829
2	49740001	49840000	0.176829
2	49750001	49850000	0.176829
2	49800001	49900000	0.210084
2	49810001	49910000	0.160053
2	49820001	49920000	0.160053
2	49830001	49930000	0.160053
2	49840001	49940000	0.160053
2	49850001	49950000	0.160053
2	49860001	49960000	0.160053
2	49870001	49970000	0.160053
2	49880001	49980000	0.160053
2	49890001	49990000	0.160053
2	63380001	63480000	0.162791
2	63390001	63490000	0.162791
2	67690001	67790000	0.14723
2	67700001	67800000	0.14723
2	67710001	67810000	0.14723
2	67720001	67820000	0.14723
2	67730001	67830000	0.14723
2	67740001	67840000	0.14723
2	67750001	67850000	0.14723
2	67760001	67860000	0.14723
2	67770001	67870000	0.14723
2	67780001	67880000	0.14723
2	67790001	67890000	0.14723
2	67800001	67900000	0.14723
2	67810001	67910000	0.14723
2	69010001	69110000	0.148237
2	69020001	69120000	0.148237
2	69030001	69130000	0.148237
2	69040001	69140000	0.148237
2	69150001	69250000	0.173228
2	69160001	69260000	0.173228
2	69170001	69270000	0.173228
2	69180001	69280000	0.173228
2	69190001	69290000	0.173228
2	69200001	69300000	0.173228
2	69210001	69310000	0.173228
2	69220001	69320000	0.173228
2	69230001	69330000	0.173228
2	69240001	69340000	0.173228
2	69440001	69540000	0.15402
2	69450001	69550000	0.15402
2	69460001	69560000	0.157123
2	69470001	69570000	0.157123
2	69480001	69580000	0.157123
2	69490001	69590000	0.157123
2	69500001	69600000	0.157123
2	69510001	69610000	0.163286
2	69520001	69620000	0.163286
2	69530001	69630000	0.169391
2	69540001	69640000	0.163286
2	69550001	69650000	0.163286
2	69560001	69660000	0.163286
2	69570001	69670000	0.163286
2	69580001	69680000	0.163286
2	69590001	69690000	0.163286
2	69600001	69700000	0.169391
2	69610001	69710000	0.163286
2	69620001	69720000	0.181429
2	69630001	69730000	0.181429
2	69640001	69740000	0.181429
2	69650001	69750000	0.181429
2	69660001	69760000	0.181429
2	69670001	69770000	0.181429
2	69680001	69780000	0.181429
2	69690001	69790000	0.181429
2	69850001	69950000	0.162338
2	69860001	69960000	0.162338
2	69870001	69970000	0.162338
2	69880001	69980000	0.162338
2	69890001	69990000	0.162338
2	69900001	70000000	0.162338
2	69910001	70010000	0.162338
2	69920001	70020000	0.181429
2	69930001	70030000	0.181429
2	69940001	70040000	0.181429
2	70460001	70560000	0.181429
2	70470001	70570000	0.181429
2	70480001	70580000	0.181429
2	70490001	70590000	0.181429
2	70500001	70600000	0.181429
2	70510001	70610000	0.179788
2	70520001	70620000	0.179788
2	70530001	70630000	0.179788
2	70540001	70640000	0.17924
2	70550001	70650000	0.17924
2	70560001	70660000	0.178141
2	70570001	70670000	0.178141
2	70580001	70680000	0.178141
2	70590001	70690000	0.178141
2	70600001	70700000	0.178965
2	70610001	70710000	0.17924
2	70620001	70720000	0.17924
2	70630001	70730000	0.17924
2	70640001	70740000	0.179788
2	70650001	70750000	0.179788
2	70660001	70760000	0.179788
2	70670001	70770000	0.179788
2	70680001	70780000	0.181429
2	70690001	70790000	0.181429
2	70940001	71040000	0.181429
2	70950001	71050000	0.181429
2	70960001	71060000	0.181429
2	70970001	71070000	0.181429
2	70980001	71080000	0.181429
2	70990001	71090000	0.181429
2	71000001	71100000	0.181429
2	71010001	71110000	0.193945
2	71020001	71120000	0.210415
2	71030001	71130000	0.210415
2	71040001	71140000	0.229617
2	71050001	71150000	0.229617
2	71060001	71160000	0.229617
2	71070001	71170000	0.229617
2	71080001	71180000	0.229617
2	71090001	71190000	0.245161
2	71100001	71200000	0.229617
2	71110001	71210000	0.233302
2	71120001	71220000	0.239598
2	71130001	71230000	0.239598
2	71140001	71240000	0.233302
2	71150001	71250000	0.220588
2	71160001	71260000	0.220588
2	71170001	71270000	0.220588
2	71180001	71280000	0.220588
2	71190001	71290000	0.21288
2	71200001	71300000	0.220588
2	71210001	71310000	0.21288
2	71220001	71320000	0.181429
2	71230001	71330000	0.190832
2	71240001	71340000	0.190832
2	71250001	71350000	0.193945
2	71260001	71360000	0.193945
2	71270001	71370000	0.193945
2	71280001	71380000	0.193945
2	71290001	71390000	0.200141
2	71300001	71400000	0.200141
2	71310001	71410000	0.218487
2	71320001	71420000	0.218487
2	71460001	71560000	0.179602
2	71470001	71570000	0.180672
2	71480001	71580000	0.180672
2	71490001	71590000	0.178571
2	71500001	71600000	0.178571
2	71510001	71610000	0.178571
2	71900001	72000000	0.173228
2	71910001	72010000	0.173228
2	71920001	72020000	0.173228
2	71930001	72030000	0.173228
2	71940001	72040000	0.173228
2	72050001	72150000	0.176829
2	72320001	72420000	0.180509
2	72330001	72430000	0.180509
2	72340001	72440000	0.180509
2	72360001	72460000	0.14898
2	72370001	72470000	0.14898
2	72380001	72480000	0.14898
2	72390001	72490000	0.14898
2	72400001	72500000	0.14898
2	72410001	72510000	0.14898
2	72450001	72550000	0.176829
2	72700001	72800000	0.210084
2	72710001	72810000	0.210084
2	72720001	72820000	0.210084
2	72730001	72830000	0.210084
2	72740001	72840000	0.210084
2	72750001	72850000	0.210084
2	72760001	72860000	0.210084
2	72770001	72870000	0.210084
2	72780001	72880000	0.210084
2	72790001	72890000	0.210084
2	72860001	72960000	0.25
2	72870001	72970000	0.25
2	72880001	72980000	0.25
2	72890001	72990000	0.25
2	72900001	73000000	0.25
2	72910001	73010000	0.25
2	72920001	73020000	0.25
2	72930001	73030000	0.25
2	72940001	73040000	0.25
2	72950001	73050000	0.25
2	73120001	73220000	0.14898
2	73130001	73230000	0.14898
2	73140001	73240000	0.14898
2	73150001	73250000	0.216544
2	73160001	73260000	0.216544
2	73170001	73270000	0.216544
2	73180001	73280000	0.216544
2	73190001	73290000	0.216544
2	73200001	73300000	0.216544
2	73390001	73490000	0.187578
2	73400001	73500000	0.174216
2	73410001	73510000	0.184197
2	73420001	73520000	0.184197
2	73430001	73530000	0.175095
2	73440001	73540000	0.175095
2	73450001	73550000	0.166867
2	73460001	73560000	0.153411
2	73470001	73570000	0.153411
2	73480001	73580000	0.153411
2	73710001	73810000	0.15311
2	73720001	73820000	0.15311
2	73730001	73830000	0.15311
2	73740001	73840000	0.15625
2	73750001	73850000	0.162162
2	73830001	73930000	0.167948
2	73840001	73940000	0.167948
2	73850001	73950000	0.167948
2	73860001	73960000	0.167948
2	73870001	73970000	0.167948
2	73880001	73980000	0.180293
2	73890001	73990000	0.180293
2	73900001	74000000	0.180293
2	73910001	74010000	0.180293
2	73920001	74020000	0.180293
2	74200001	74300000	0.309524
2	74210001	74310000	0.309524
2	74220001	74320000	0.309524
2	74230001	74330000	0.222644
2	74240001	74340000	0.195305
2	74250001	74350000	0.195305
2	74260001	74360000	0.195305
2	74270001	74370000	0.195305
2	74280001	74380000	0.195305
2	74290001	74390000	0.195305
2	74360001	74460000	0.173228
2	74630001	74730000	0.289304
2	74640001	74740000	0.289304
2	74650001	74750000	0.289304
2	74660001	74760000	0.289304
2	74670001	74770000	0.289304
2	74680001	74780000	0.289304
2	74690001	74790000	0.289304
2	74700001	74800000	0.289304
2	75090001	75190000	0.309524
2	75100001	75200000	0.309524
2	75110001	75210000	0.309524
2	75120001	75220000	0.309524
2	75130001	75230000	0.309524
2	75140001	75240000	0.309524
2	75150001	75250000	0.309524
2	75160001	75260000	0.309524
2	75170001	75270000	0.309524
2	75180001	75280000	0.309524
2	75730001	75830000	0.176829
2	75740001	75840000	0.176829
2	75750001	75850000	0.176829
2	75760001	75860000	0.176829
2	75770001	75870000	0.176829
2	75780001	75880000	0.176829
2	75790001	75890000	0.176829
2	75800001	75900000	0.15471
2	76040001	76140000	0.178141
2	76050001	76150000	0.178141
2	76060001	76160000	0.178141
2	76070001	76170000	0.178141
2	76080001	76180000	0.178141
2	76090001	76190000	0.178141
2	76380001	76480000	0.176829
2	76390001	76490000	0.176829
2	76400001	76500000	0.176829
2	76410001	76510000	0.176829
2	76420001	76520000	0.176829
2	76520001	76620000	0.22117
2	76530001	76630000	0.22117
2	76540001	76640000	0.22117
2	76550001	76650000	0.22117
2	76560001	76660000	0.22117
2	76570001	76670000	0.22117
2	76580001	76680000	0.22117
2	76590001	76690000	0.22117
2	76600001	76700000	0.22117
2	76610001	76710000	0.22117
2	76710001	76810000	0.22117
2	76720001	76820000	0.22117
2	76730001	76830000	0.22117
2	76740001	76840000	0.153226
2	76750001	76850000	0.153226
2	76760001	76860000	0.153226
2	76770001	76870000	0.20659
2	76780001	76880000	0.176482
2	76790001	76890000	0.176482
2	76800001	76900000	0.176482
2	76810001	76910000	0.15436
2	76820001	76920000	0.15436
2	76830001	76930000	0.15436
2	76840001	76940000	0.208221
2	76850001	76950000	0.208221
2	76860001	76960000	0.208221
2	76870001	76970000	0.208221
2	76880001	76980000	0.267578
2	76890001	76990000	0.267578
2	76900001	77000000	0.267578
2	76910001	77010000	0.267578
2	76920001	77020000	0.267578
2	76930001	77030000	0.267578
2	76940001	77040000	0.267578
2	76950001	77050000	0.267578
2	76960001	77060000	0.309524
2	76970001	77070000	0.309524
2	76980001	77080000	0.309524
2	76990001	77090000	0.309524
2	77000001	77100000	0.309524
2	77010001	77110000	0.309524
2	77020001	77120000	0.309524
2	77030001	77130000	0.309524
2	77040001	77140000	0.276896
2	77050001	77150000	0.276896
2	77060001	77160000	0.276896
2	77070001	77170000	0.248768
2	77080001	77180000	0.27151
2	77090001	77190000	0.27151
2	77100001	77200000	0.27151
2	77110001	77210000	0.27151
2	77120001	77220000	0.27151
2	77130001	77230000	0.27151
2	77140001	77240000	0.29374
2	77150001	77250000	0.258721
2	77160001	77260000	0.258721
2	77170001	77270000	0.258721
2	77180001	77280000	0.22117
2	77190001	77290000	0.22117
2	77200001	77300000	0.22117
2	77380001	77480000	0.183673
2	77390001	77490000	0.183673
2	77400001	77500000	0.183673
2	77410001	77510000	0.183673
2	77420001	77520000	0.183673
2	77430001	77530000	0.183673
2	77440001	77540000	0.183673
2	77450001	77550000	0.183673
2	77460001	77560000	0.183673
2	77470001	77570000	0.183673
2	77780001	77880000	0.203297
2	77790001	77890000	0.203297
2	77800001	77900000	0.209572
2	77810001	77910000	0.209572
2	77820001	77920000	0.209572
2	77830001	77930000	0.209572
2	77840001	77940000	0.209572
2	77850001	77950000	0.209572
2	77860001	77960000	0.203297
2	77870001	77970000	0.203297
2	77880001	77980000	0.221748
2	77890001	77990000	0.203297
2	77900001	78000000	0.183673
2	77910001	78010000	0.183673
2	77920001	78020000	0.183673
2	77930001	78030000	0.183673
2	77940001	78040000	0.203297
2	77950001	78050000	0.203297
2	77960001	78060000	0.203297
2	77970001	78070000	0.203297
2	77980001	78080000	0.203297
2	77990001	78090000	0.221748
2	78000001	78100000	0.221748
2	78010001	78110000	0.221748
2	78020001	78120000	0.221748
2	78030001	78130000	0.221748
2	78070001	78170000	0.289304
2	78080001	78180000	0.289304
2	78090001	78190000	0.289304
2	78100001	78200000	0.15633
2	78110001	78210000	0.196879
2	78120001	78220000	0.196879
2	78130001	78230000	0.196879
2	78140001	78240000	0.196879
2	78150001	78250000	0.196879
2	78160001	78260000	0.196879
2	78170001	78270000	0.189498
2	78180001	78280000	0.189498
2	78190001	78290000	0.189498
2	78200001	78300000	0.248768
2	78210001	78310000	0.248768
2	78220001	78320000	0.248768
2	78230001	78330000	0.248768
2	78240001	78340000	0.248768
2	78250001	78350000	0.248768
2	78260001	78360000	0.248768
2	78280001	78380000	0.183673
2	78290001	78390000	0.183673
2	78300001	78400000	0.183673
2	78310001	78410000	0.193638
2	78320001	78420000	0.199469
2	78330001	78430000	0.199469
2	78340001	78440000	0.199469
2	78350001	78450000	0.199469
2	78360001	78460000	0.199469
2	78370001	78470000	0.199469
2	78380001	78480000	0.203297
2	78390001	78490000	0.209572
2	78400001	78500000	0.221748
2	78410001	78510000	0.221748
2	80360001	80460000	0.152697
2	80370001	80470000	0.152697
2	80380001	80480000	0.253752
2	80390001	80490000	0.253752
2	80400001	80500000	0.253752
2	80410001	80510000	0.253752
2	80420001	80520000	0.253752
2	80430001	80530000	0.253752
2	80440001	80540000	0.253752
2	80450001	80550000	0.253752
2	80460001	80560000	0.233193
2	80470001	80570000	0.233193
2	80480001	80580000	0.233193
2	81310001	81410000	0.247619
2	81320001	81420000	0.247619
2	81330001	81430000	0.247619
2	81340001	81440000	0.247619
2	81350001	81450000	0.247619
2	81360001	81460000	0.247619
2	81370001	81470000	0.247619
2	81380001	81480000	0.247619
2	81390001	81490000	0.247619
2	81400001	81500000	0.247619
2	81910001	82010000	0.210714
2	81920001	82020000	0.249583
2	81930001	82030000	0.249583
2	81940001	82040000	0.249583
2	81950001	82050000	0.249583
2	81960001	82060000	0.249583
2	81970001	82070000	0.249583
2	81980001	82080000	0.249583
2	81990001	82090000	0.249583
2	82000001	82100000	0.249583
2	83040001	83140000	0.180403
2	83050001	83150000	0.180403
2	83060001	83160000	0.180403
2	83070001	83170000	0.180403
2	83080001	83180000	0.180403
2	83490001	83590000	0.167774
2	83500001	83600000	0.167774
2	83510001	83610000	0.167774
2	83520001	83620000	0.167774
2	83530001	83630000	0.167774
2	83540001	83640000	0.167774
2	83550001	83650000	0.167774
2	83560001	83660000	0.167774
2	83570001	83670000	0.167774
2	83580001	83680000	0.167774
2	84720001	84820000	0.156535
2	84730001	84830000	0.156535
2	84740001	84840000	0.156535
2	84750001	84850000	0.195238
2	85300001	85400000	0.28392
2	85310001	85410000	0.28392
2	85430001	85530000	0.2
2	85740001	85840000	0.162805
2	85750001	85850000	0.162805
2	85760001	85860000	0.233151
2	85770001	85870000	0.233151
2	85780001	85880000	0.233151
2	85790001	85890000	0.233151
2	85800001	85900000	0.454474
2	85810001	85910000	0.454474
2	85820001	85920000	0.454474
2	85830001	85930000	0.454474
2	87480001	87580000	0.228395
2	89040001	89140000	0.197002
2	89050001	89150000	0.344485
2	89060001	89160000	0.344485
2	89070001	89170000	0.344485
2	89080001	89180000	0.344485
2	89090001	89190000	0.243501
2	89100001	89200000	0.243501
2	89110001	89210000	0.243501
2	89120001	89220000	0.243501
2	89130001	89230000	0.243501
2	89140001	89240000	0.164811
2	89150001	89250000	0.164811
2	89320001	89420000	0.189342
2	89330001	89430000	0.189342
2	89340001	89440000	0.189342
2	89350001	89450000	0.189342
2	89400001	89500000	0.257558
2	89410001	89510000	0.257558
2	89420001	89520000	0.257558
2	89430001	89530000	0.257558
2	89440001	89540000	0.257558
2	89450001	89550000	0.171872
2	89460001	89560000	0.210302
2	89470001	89570000	0.210302
2	89480001	89580000	0.210302
[truncated: 8,159 more rows]
