# Supplementary material for: Genome-wide single nucleotide polymorphism (SNP) data reveal potential candidate genes for litter traits in a Yorkshire pig population
Source: Copernicus journal article supplement (doi:10.5194/aab-66-357-2023), 2023-11-23
Supplement: Supplementary file 7 [file Table S4.xlsx]

## Sheet: FST_PI_gene_删除loc
Table S4. A summary of genes from FST and θπ ratio in in Yorkshire pigs
Chrom	Strand	TxStart	TxEnd	Exon Count	name
chr1	-	10697926	10833557	4	TULP4
chr1	-	11475838	11548441	7	ZDHHC14
chr1	+	18440911	18462186	6	PCMT1
chr1	-	18476651	18537105	7	LRP11
chr1	+	21856640	21938994	30	SHPRH
chr1	-	42053738	42198706	6	NKAIN2
chr1	-	43889758	43979629	7	CLVS2
chr1	-	44076442	44094659	8	SMPDL3A
chr1	-	44098035	44102111	4	FABP7
chr1	-	44139006	44275699	8	PKIB
chr1	-	44452504	44544417	14	HSF2
chr1	+	47894683	48057901	12	MAN1A1
chr1	+	48197132	48261697	16	FAM184A
chr1	-	48350740	48365279	4	ASF1A
chr1	+	48621998	48764540	11	CEP85L
chr1	-	48678935	48688510	2	PLN
chr1	-	48982794	49188744	6	SLC35F1
chr1	-	49503143	49532778	5	NUS1
chr1	+	49584130	49631566	8	GOPC
chr1	-	49645882	49718886	15	DCBLD1
chr1	+	49755362	49864460	38	ROS1
chr1	-	49878271	49904471	4	VGLL2
chr1	+	56204149	56562463	52	COL19A1
chr1	-	82739756	82746514	4	PDSS2
chr1	+	82785728	82958188	6	SOBP
chr1	+	83109096	83125464	3	SCML4
chr1	+	88133048	88134492	2	RFPL4B
chr1	-	106898130	106991213	11	SMAD2
chr1	-	107088934	107269279	7	ZBTB7C
chr1	+	107666563	108030875	13	CTIF
chr1	-	108087676	108115951	4	SMAD7
chr1	-	108439090	108446227	3	C1H18orf32
chr1	-	108447523	108451400	8	RPL17
chr1	+	142444647	142478602	13	FRMD5
chr1	+	143202497	143318189	43	UBR1
chr1	+	143333491	143478045	15	TTBK2
chr1	-	144883362	144900726	19	TYRO3
chr1	+	144910411	144927720	23	RPAP1
chr1	+	144931289	144938987	27	LTK
chr1	-	144939081	144947563	7	ITPKA
chr1	-	144958161	145015973	18	RTF1
chr1	+	145057618	145063219	5	OIP5
chr1	+	145130828	145136685	3	NDUFAF1
chr1	-	145221138	145259701	7	CHP1
chr1	+	145259795	145314385	12	EXD1
chr1	+	145362762	145504972	36	INO80
chr1	-	145522841	145525941	4	CHAC1
chr1	-	145539043	145548860	12	DLL4
chr1	-	145570606	145576005	3	VPS18
chr1	+	145601573	145603636	3	RHOV
chr1	-	145616936	145631573	10	SPINT1
chr1	+	145631422	145667763	5	PPP1R14D
chr1	-	145751296	145798501	10	RAD51
chr1	-	145808837	145809966	1	RPUSD2
chr1	+	145824127	145833975	7	CASC5
chr1	-	145930318	145932401	1	CHST14
chr1	-	145935048	145943874	6	BAHD1
chr1	-	145981543	145995640	12	IVD
chr1	-	145996323	146015175	11	KNSTRN
chr1	-	153523943	153853776	21	IGF1R
chr1	+	154019588	154047542	6	SYNM
chr1	-	154050038	154154657	11	TTC23
chr1	+	154171004	154364407	9	LRRC28
chr1	+	155637572	155847455	30	LRRK1
chr1	-	271587031	271591364	3	BAAT
chr2	+	2342275	2348167	4	CCND1
chr2	-	27638105	27737932	5	TRIM44
chr2	-	27783596	27786135	1	FJX1
chr2	+	27785479	27954886	14	PAMR1
chr2	+	27968215	28136634	11	SLC1A2
chr2	-	28156389	28249911	16	CD44
chr2	+	77378832	77397544	3	ONECUT3
chr2	-	77457927	77468123	2	KLF16
chr2	-	77470546	77506670	16	MED16
chr2	+	77472357	77477327	5	PRTN3
chr2	+	77480249	77485906	5	ELANE
chr2	+	77485652	77487849	5	CFD
chr2	-	77508533	77518363	8	R3HDM4
chr2	+	77518435	77525279	6	KISS1R
chr2	+	77532701	77569032	9	ARID3A
chr2	+	77781974	77784843	5	ATP5D
chr2	-	77790524	77797435	6	MIDN
chr2	+	77814540	77823643	9	STK11
chr2	-	77823482	77831001	7	CBARP
chr2	+	77835323	77837202	5	CIRBP
chr2	+	77841257	77844392	3	C2H19orf24
chr2	+	77849810	77863280	4	EFNA2
chr2	-	77876315	77878381	4	REEP6
chr2	+	77881927	77888191	15	PCSK4
chr2	+	77891263	77895615	2	C2H19orf25
chr2	-	77897989	77926867	15	APC2
chr2	-	77935613	77937034	3	RPS15
chr2	-	77941174	77962862	12	DAZAP1
chr2	+	77968843	77972034	7	GAMT
chr2	-	77971900	77979426	7	NDUFS7
chr2	-	78106380	78113457	13	ADAMTSL5
chr2	+	78124258	78132107	12	PLK5
chr2	-	78284479	78287723	5	AZU1
chr2	-	78316217	78324105	2	MISP
chr2	-	78325995	78327174	3	PRSS57
chr2	+	78333779	78352317	8	PALM
chr2	-	78360160	78371225	16	PTBP1
chr2	+	81341285	81367597	15	CLK4
chr2	+	81381286	81748685	26	COL23A1
chr2	+	92433580	92661452	8	ATG10
chr2	-	94207479	94655178	12	EDIL3
chr2	+	107095360	107128389	14	CAST
chr2	-	107137500	107167672	17	ERAP1
chr2	+	123463547	123612813	8	KCNN2
chr2	-	124682077	124691898	3	TMED7
chr2	-	124815756	124827728	5	CDO1
chr2	-	124835747	124851487	4	ATG12
chr2	+	128752283	128841343	24	HSD17B4
chr2	+	128875503	128905703	7	FAM170A
chr2	-	134840573	134840827	1	GRAMD3
chr2	+	157141853	157186531	16	ABLIM3
chr2	+	157208701	157273006	19	AFAP1L1
chr3	-	1066651	1085750	18	MICALL2
chr3	-	1094037	1120189	47	INTS1
chr3	+	1138007	1149711	3	MAFK
chr3	-	1149553	1159110	9	TMEM184A
chr3	-	55031485	55196190	33	MAP4K4
chr3	+	56762724	57316245	23	AFF3
chr3	-	58552119	58716306	22	VWA3B
chr3	-	62820777	62821794	3	TMSB10
chr3	+	62846051	62902483	13	TRABD2A
chr3	-	143905447	143910293	2	FAM84A
chr4	-	135471128	135491365	3	DR1
chr4	+	135564673	135581598	4	TMED5
chr5	-	4177906	4180704	2	NFAM1
chr5	-	4235772	4241592	4	MEI1
chr5	-	4248427	4255702	3	C5H22orf46
chr5	+	4262170	4271206	3	SNU13
chr5	-	4274585	4300429	14	XRCC6
chr5	-	6122717	6146897	11	TAB1
chr5	-	6168730	6174529	3	SYNGR1
chr5	+	6216928	6223999	10	RPL3
chr5	+	6516705	6536718	18	SUN2
chr5	-	6537794	6562553	11	GTPBP1
chr5	+	6566579	6575819	4	JOSD1
chr5	-	6579625	6581626	4	TOMM22
chr5	-	6591180	6601767	6	CBY1
chr5	+	6601910	6697380	19	FAM227A
chr5	+	17058979	17187442	39	DIP2B
chr5	+	17058979	17187442	39	DIP2B
chr5	+	17222729	17239769	10	POU6F1
chr5	-	22912563	22914601	4	RPS26
chr5	+	22941173	22947591	6	CDK2
chr5	+	22975698	22981580	3	ZC3H10
chr5	+	22986044	23003135	31	ESYT1
chr5	-	23036415	23041663	7	NABP2
chr5	-	72799315	73100997	20	CPNE8
chr6	+	10445892	10488115	5	ADAMTS18
chr6	+	83543197	83565916	4	ZNF362
chr6	-	83571440	83573210	1	A3GALT2
chr6	-	83826341	83843531	8	ZSCAN20
chr6	+	84319481	84361372	7	C6H1orf94
chr6	+	119073704	119079440	5	PDZK1IP1
chr6	+	119212678	119272344	13	MCOLN2
chr6	+	119296647	119374246	3	LPAR3
chr6	-	136685349	136757434	10	UBE2U
chr6	-	136767336	136909420	7	ROR1
chr6	-	139663733	139782164	12	C6H1orf87
chr6	-	139902274	139929828	10	CYP2J34
chr6	+	140117268	140192068	22	HOOK1
chr6	+	142972879	143123994	13	DAB1
chr6	+	143164800	143205861	12	C8B
chr6	-	143217804	143266588	10	C8A
chr6	+	143323565	143489977	9	C6H1orf168
chr7	-	20197244	20368405	10	DCDC2
chr7	+	20394719	20442106	11	MRS2
chr7	-	44942465	44951862	3	MRPL14
chr7	+	44954528	44981984	24	TMEM63B
chr7	+	44986149	45008841	22	CAPN11
chr7	+	45087417	45104152	14	SLC29A1
chr7	+	47233578	47249978	4	ENPP5
chr7	-	47256406	47272034	4	ENPP4
chr7	-	48301436	48390428	22	ADGRF5
chr7	-	48466208	48497395	15	ADGRF1
chr9	-	8856600	8870878	8	PLEKHB1
chr9	+	13217314	13228258	3	AQP11
chr9	-	13245178	13266187	7	CLNS1A
chr9	-	13276503	13448588	16	RSF1
chr9	+	28097756	28730250	24	FAT3
chr9	+	50441506	50474587	12	TMPRSS4
chr9	-	50492494	50516468	6	SCN4B
chr9	-	50526025	50539517	4	SCN2B
chr9	-	51881266	51894114	8	PVRL1
chr9	-	100401676	100641890	26	RAPGEF5
chr10	-	33267121	33402800	21	NAA35
chr10	+	59371369	59719067	7	NEBL
chr10	+	59410780	59418401	4	C10H10orf113
chr11	+	12355479	12364742	9	CCNA1
chr11	-	13401849	13486078	3	TRPC4
chr11	-	48207855	48598451	10	DACH1
chr11	+	66666601	67323189	9	GPC5
chr11	-	87211487	87363659	31	RNF17
chr12	+	3294253	3337919	5	TIMP2
chr12	+	3348807	3384781	19	USP36
chr12	+	13197690	13602529	14	PRKCA
chr12	+	23674036	23761713	23	NPEPPS
chr12	+	23785820	23813399	22	KPNB1
chr12	-	38345060	39039973	27	BCAS3
chr12	+	39632791	39642290	8	CA4
chr12	+	39695000	39730210	14	GGNBP2
chr12	+	39732407	39741854	7	DHRS11
chr12	+	39742894	39748445	5	MRM1
chr13	-	19795948	20033657	12	OSBPL10
chr13	+	21193108	21243506	15	PDCD6IP
chr13	-	148628556	148835696	21	STXBP5L
chr13	-	160195330	160273588	11	HHLA2
chr13	+	160336853	160394816	11	IFT57
chr13	-	166068351	166535103	31	ZPLD1
chr13	-	168488978	168533672	9	CMSS1
chr13	+	169086121	169094141	2	COL8A1
chr13	-	169142653	169146010	1	FILIP1L
chr13	-	170305810	170328056	8	ST3GAL6
chr13	-	170350089	170362313	6	DCBLD2
chr13	+	170521919	170535349	7	CPOX
chr13	-	170557576	170579565	3	GPR15
chr13	+	170586983	170595207	5	CLDND1
chr13	-	172665063	172743604	15	CRYBG3
chr13	-	176447512	176506860	6	NSUN3
chr13	-	176513452	176539084	7	ARL13B
chr13	+	176541457	176557579	2	STX19
chr13	-	177670368	177810115	10	EPHA3
chr13	+	179453194	179468900	6	POU1F1
chr13	-	179477381	179512028	6	CHMP2B
chr13	+	179675641	179707722	5	VGLL3
chr13	-	210991593	211046845	8	DSCR3
chr14	+	79572300	79628480	15	SGPL1
chr14	-	79648885	79655375	4	PCBD1
chr14	-	119115752	119128176	11	PYROXD2
chr14	+	136580105	137250652	29	ATRNL1
chr15	+	124033357	124184546	17	MAP2
chr16	+	24682041	24902403	21	EGFLAM
chr16	-	24923885	24995064	20	LIFR
chr16	-	35128854	35579611	5	ARL15
chr16	+	49212354	49229137	3	CD180
chr16	+	52391813	52489652	7	MAP1B
chr16	-	52497269	52593611	11	MRPS27
chr16	+	53229706	53296875	26	TNPO1
chr16	+	53333852	53338671	3	DRD1
chr16	-	72423125	72526427	3	SGCD
chr16	+	74589576	74592407	2	HAND1
chr16	+	76522956	76535804	4	NMUR2
chr16	+	85558916	85563495	5	IRX4
chr16	-	85607047	85608340	2	MRPL36
chr16	+	85609833	85615919	4	NDUFS6
chr17	+	29095047	29329854	13	PCSK2
chr17	-	29343022	29376119	8	BFSP1
chr17	+	29448873	29455841	3	DSTN
chr17	-	29460246	29524210	27	RRBP1
chr18	-	10841037	10933658	15	UBN2
chr18	-	10945087	10992004	18	TTC26
chr18	+	11012929	11065924	12	ZC3HAV1
