# Supplementary material for: Genome-wide single nucleotide polymorphism (SNP) data reveal potential candidate genes for litter traits in a Yorkshire pig population
Source: Copernicus journal article supplement (doi:10.5194/aab-66-357-2023), 2023-11-23
Supplement: Supplementary file 8 [file Table S5.xlsx]

## Sheet: Sheet1
Table S5.GO and KEGG enrichment results of candidate genes between the HP and LP sows overlapped by FST and θπ ratio.
Term	Count	P_Value	Genes
GO:0006508~proteolysis	7	0.00145225	CFD, NPEPPS, CAPN11, ERAP1, PRTN3, AZU1, ELANE
GO:0006957~complement activation, alternative pathway	3	0.00846223	CFD, C8B, C8A
GO:0007218~neuropeptide signaling pathway	5	0.0103602	PYY, NPY2R, KISS1R, TYRO3, PPY
GO:0030198~extracellular matrix organization	6	0.0219848	EGFLAM, OLFML2B, SPINT1, ADAMTSL5, ADAMTS18, COL8A1
GO:0071073~positive regulation of phospholipid biosynthetic process	2	0.0234715	ADGRF5, CHP1
GO:0045595~regulation of cell differentiation	3	0.0298033	APC2, PTBP1, PLEKHB1
GO:0098810~neurotransmitter reuptake	2	0.0463951	SLC1A2, SLC29A1
ssc04068:FoxO signaling pathway	5	0.0296677	STK11, CCND1, CDK2, ATG12, IGF1R
