# Supplementary figures and images for: Genome-wide single nucleotide polymorphism (SNP) data reveal potential candidate genes for litter traits in a Yorkshire pig population
Source: Copernicus journal article supplement (doi:10.5194/aab-66-357-2023), 2023-11-23

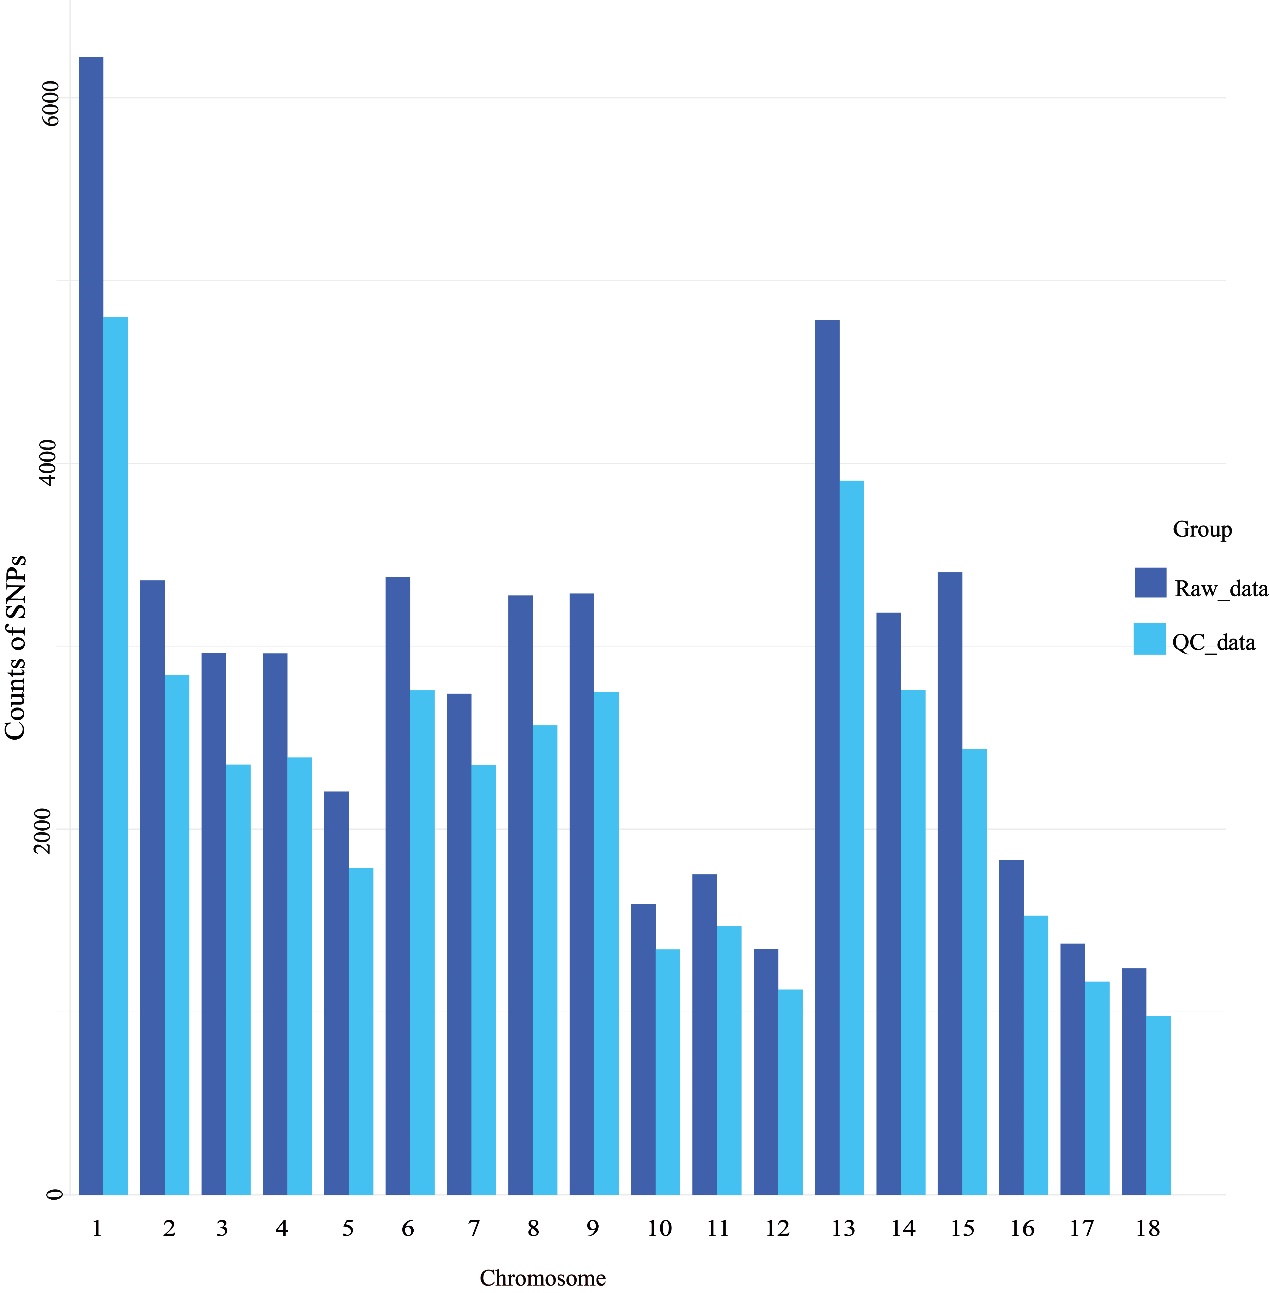


**Figure S1.** Distribution of autosomal SNPs before and after quality control.

Supplement: Supplementary file 1 [file Fig S1.docx]
